# Supplementary material for: Daily steps and life expectancy: a life table analysis of NHANES 2005-2006 and 2011-2014
Source: Research Square preprint supplement (doi:10.21203/rs.3.rs-7654206/v1), 2025-10-15
Supplement: Supplementary file 1 [file 5cb4560144ea515b4cdc7c69.docx]

**Supplemental Material**

**Table S1.** Life table model for the total cohort by categories of daily step counts.

| **Age (years)** | **Steps/d** |  |  |  |  |  |
| --- | --- | --- | --- | --- | --- | --- |
| **<4000**  **(reference group)** | **4000-5999** | **6000-7999** | **8000-9999** | **10000-11999** | ≥**12000** |
| 40 | 33.3 | 38.7 | 42.3 | 45.2 | 46.9 | 48.1 |
| 41 | 32.4 | 37.8 | 41.4 | 44.3 | 46.0 | 47.2 |
| 42 | 31.6 | 36.9 | 40.5 | 43.3 | 45.0 | 46.2 |
| 43 | 30.8 | 36.1 | 39.6 | 42.4 | 44.1 | 45.3 |
| 44 | 29.9 | 35.2 | 38.7 | 41.5 | 43.2 | 44.4 |
| 45 | 29.1 | 34.3 | 37.8 | 40.6 | 42.3 | 43.5 |
| 46 | 28.3 | 33.5 | 37.0 | 39.7 | 41.4 | 42.5 |
| 47 | 27.5 | 32.6 | 36.1 | 38.8 | 40.5 | 41.6 |
| 48 | 26.8 | 31.8 | 35.2 | 37.9 | 39.6 | 40.7 |
| 49 | 26.0 | 31.0 | 34.4 | 37.1 | 38.7 | 39.8 |
| 50 | 25.2 | 30.2 | 33.5 | 36.2 | 37.8 | 38.9 |
| 51 | 24.5 | 29.4 | 32.7 | 35.3 | 36.9 | 38.0 |
| 52 | 23.8 | 28.6 | 31.9 | 34.5 | 36.0 | 37.1 |
| 53 | 23.0 | 27.8 | 31.0 | 33.6 | 35.2 | 36.3 |
| 54 | 22.3 | 27.0 | 30.2 | 32.8 | 34.3 | 35.4 |
| 55 | 21.7 | 26.3 | 29.4 | 31.9 | 33.5 | 34.5 |
| 56 | 21.0 | 25.5 | 28.6 | 31.1 | 32.6 | 33.7 |
| 57 | 20.3 | 24.8 | 27.9 | 30.3 | 31.8 | 32.8 |
| 58 | 19.7 | 24.1 | 27.1 | 29.5 | 31.0 | 32.0 |
| 59 | 19.1 | 23.4 | 26.4 | 28.7 | 30.2 | 31.2 |
| 60 | 18.5 | 22.7 | 25.6 | 27.9 | 29.4 | 30.4 |
| 61 | 17.9 | 22.0 | 24.9 | 27.2 | 28.5 | 29.5 |
| 62 | 17.3 | 21.3 | 24.1 | 26.4 | 27.7 | 28.7 |
| 63 | 16.7 | 20.6 | 23.4 | 25.6 | 26.9 | 27.9 |
| 64 | 16.1 | 19.9 | 22.6 | 24.8 | 26.1 | 27.1 |
| 65 | 15.5 | 19.3 | 21.9 | 24.0 | 25.3 | 26.3 |
| 66 | 14.9 | 18.6 | 21.2 | 23.3 | 24.6 | 25.5 |
| 67 | 14.4 | 18.0 | 20.5 | 22.5 | 23.8 | 24.7 |
| 68 | 13.8 | 17.3 | 19.8 | 21.8 | 23.0 | 23.9 |
| 69 | 13.3 | 16.7 | 19.1 | 21.1 | 22.3 | 23.1 |
| 70 | 12.8 | 16.1 | 18.5 | 20.4 | 21.5 | 22.4 |
| 71 | 12.2 | 15.4 | 17.7 | 19.6 | 20.7 | 21.6 |
| 72 | 11.6 | 14.8 | 17.0 | 18.8 | 20.0 | 20.8 |
| 73 | 11.1 | 14.1 | 16.3 | 18.1 | 19.2 | 20.0 |
| 74 | 10.5 | 13.5 | 15.6 | 17.4 | 18.4 | 19.2 |
| 75 | 10.0 | 12.9 | 14.9 | 16.6 | 17.7 | 18.4 |
| 76 | 9.5 | 12.3 | 14.3 | 15.9 | 17.0 | 17.7 |
| 77 | 9.0 | 11.7 | 13.7 | 15.3 | 16.2 | 16.9 |
| 78 | 8.6 | 11.1 | 13.0 | 14.6 | 15.5 | 16.2 |
| 79 | 8.1 | 10.6 | 12.4 | 13.9 | 14.9 | 15.5 |
| 80 | 7.7 | 10.1 | 11.9 | 13.3 | 14.2 | 14.8 |
| 81 | 7.2 | 9.5 | 11.2 | 12.6 | 13.5 | 14.1 |
| 82 | 6.7 | 8.9 | 10.6 | 11.9 | 12.8 | 13.3 |
| 83 | 6.3 | 8.4 | 10.0 | 11.3 | 12.1 | 12.6 |
| 84 | 5.8 | 7.9 | 9.4 | 10.6 | 11.4 | 11.9 |
| 85 | 5.4 | 7.3 | 8.8 | 10.0 | 10.7 | 11.2 |
| 86 | 5.0 | 6.9 | 8.3 | 9.4 | 10.1 | 10.6 |
| 87 | 4.6 | 6.4 | 7.7 | 8.8 | 9.5 | 9.9 |
| 88 | 4.2 | 5.9 | 7.2 | 8.2 | 8.8 | 9.3 |
| 89 | 3.9 | 5.5 | 6.7 | 7.7 | 8.3 | 8.7 |
| 90 | 3.6 | 5.1 | 6.2 | 7.2 | 7.7 | 8.1 |
| 91 | 3.3 | 4.8 | 5.8 | 6.6 | 7.1 | 7.5 |
| 92 | 3.0 | 4.4 | 5.4 | 6.1 | 6.6 | 6.9 |
| 93 | 2.8 | 4.1 | 5.0 | 5.7 | 6.1 | 6.3 |
| 94 | 2.6 | 3.8 | 4.6 | 5.2 | 5.5 | 5.8 |
| 95 | 2.4 | 3.5 | 4.2 | 4.7 | 5.0 | 5.2 |
| 96 | 2.2 | 3.2 | 3.8 | 4.3 | 4.5 | 4.7 |
| 97 | 2.1 | 3.0 | 3.5 | 3.8 | 4.0 | 4.1 |
| 98 | 2.0 | 2.7 | 3.1 | 3.3 | 3.4 | 3.5 |
| 99 | 2.0 | 2.5 | 2.6 | 2.8 | 2.8 | 2.9 |
| 100 | 2.2 | 2.2 | 2.2 | 2.2 | 2.2 | 2.2 |

**Figure S1.** Diagram of participants selection.

**Figure S2.** Dose-response association between daily step counts and all-cause mortality.


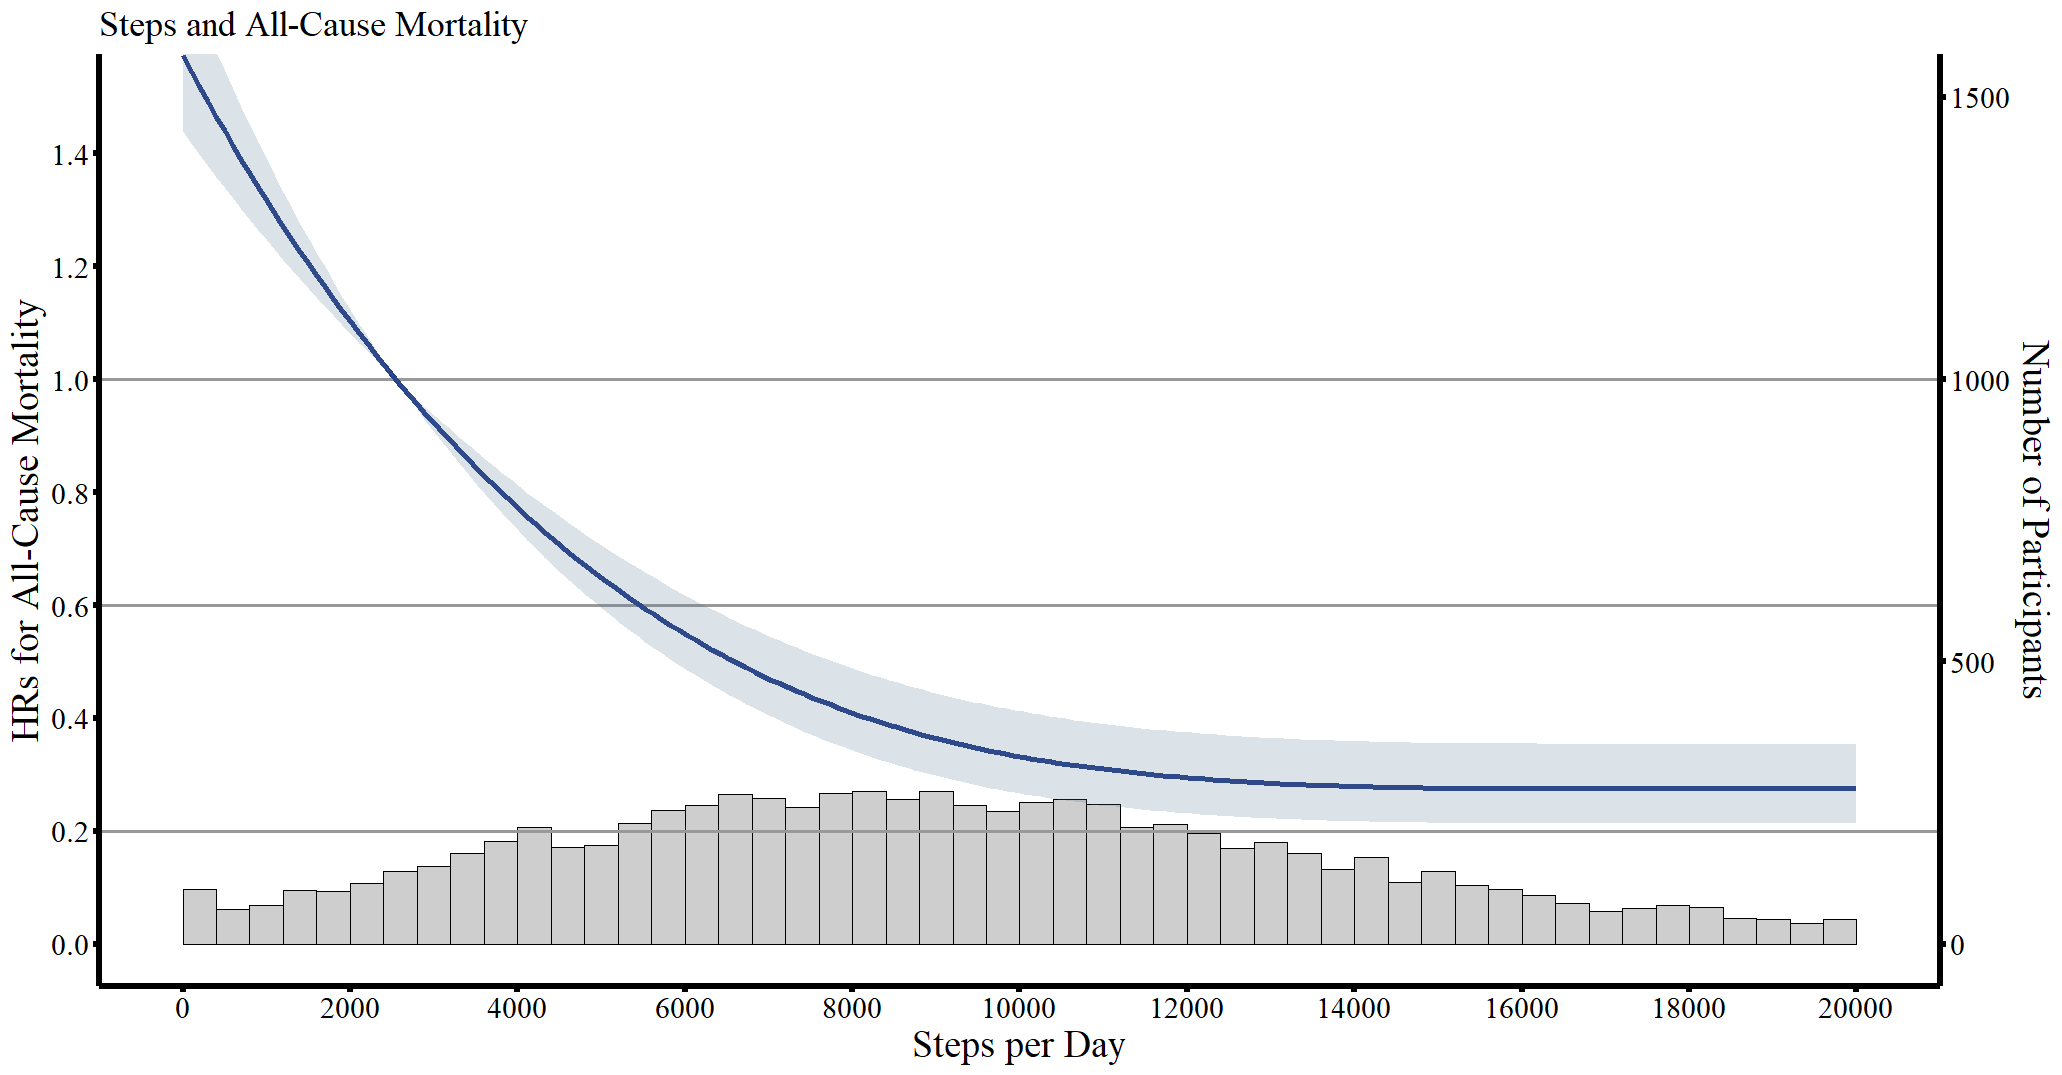


**Figure S3.** Dose-response association between daily step counts and all-cause mortality by sex (Male/Female).


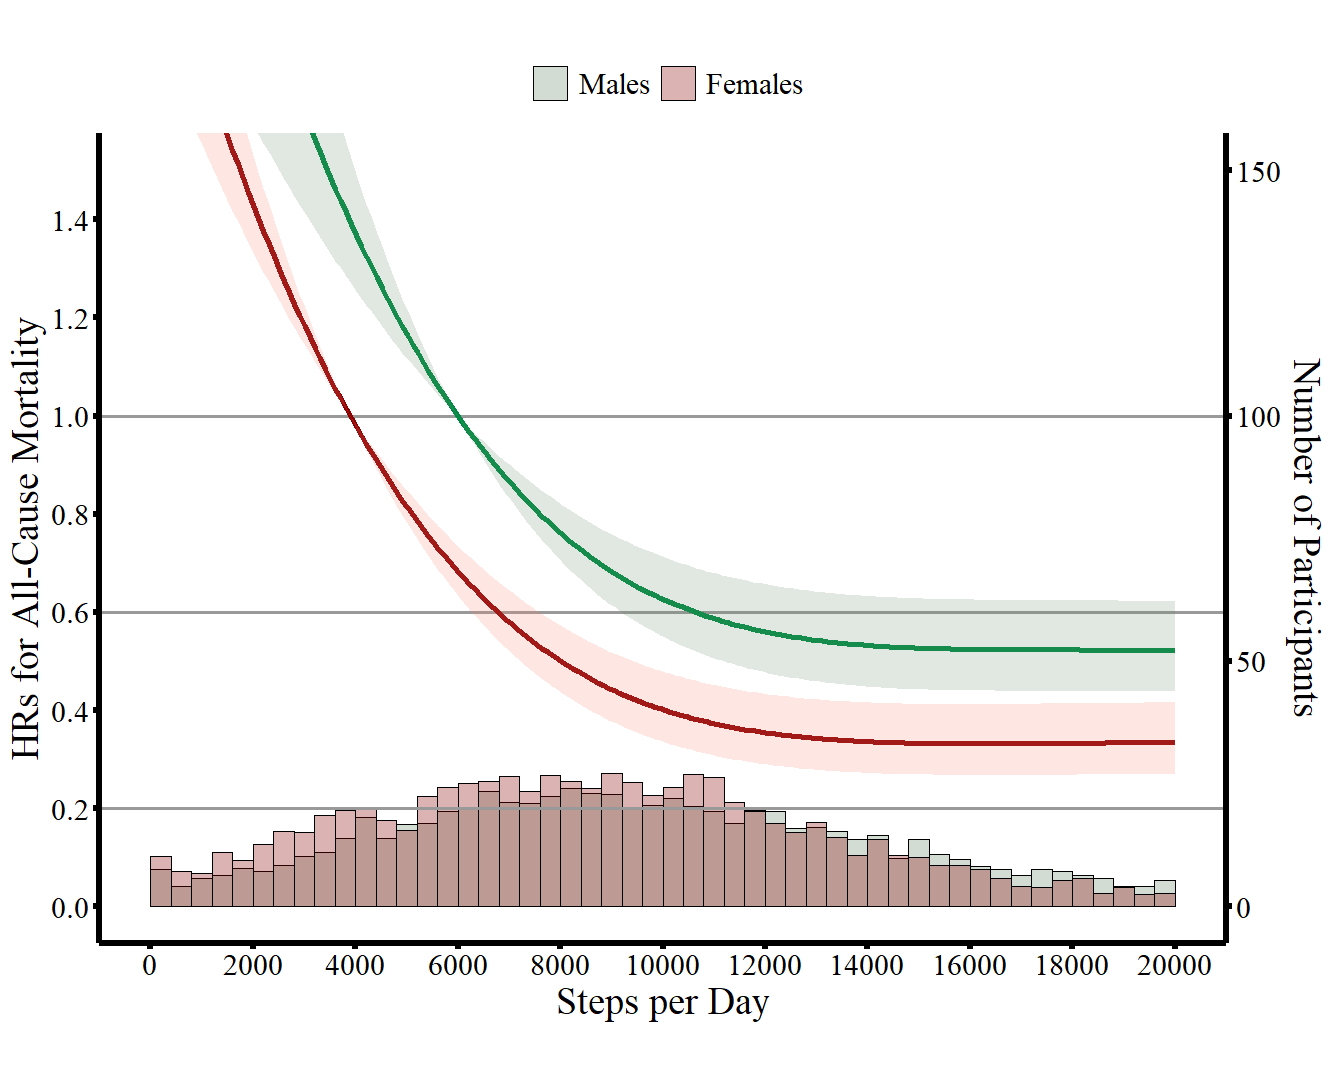


**Figure S4.** Dose-response association between daily step counts and all-cause mortality by race/ethnicity (Non-Hispanic White/Non-Hispanic Black/Hispanic).


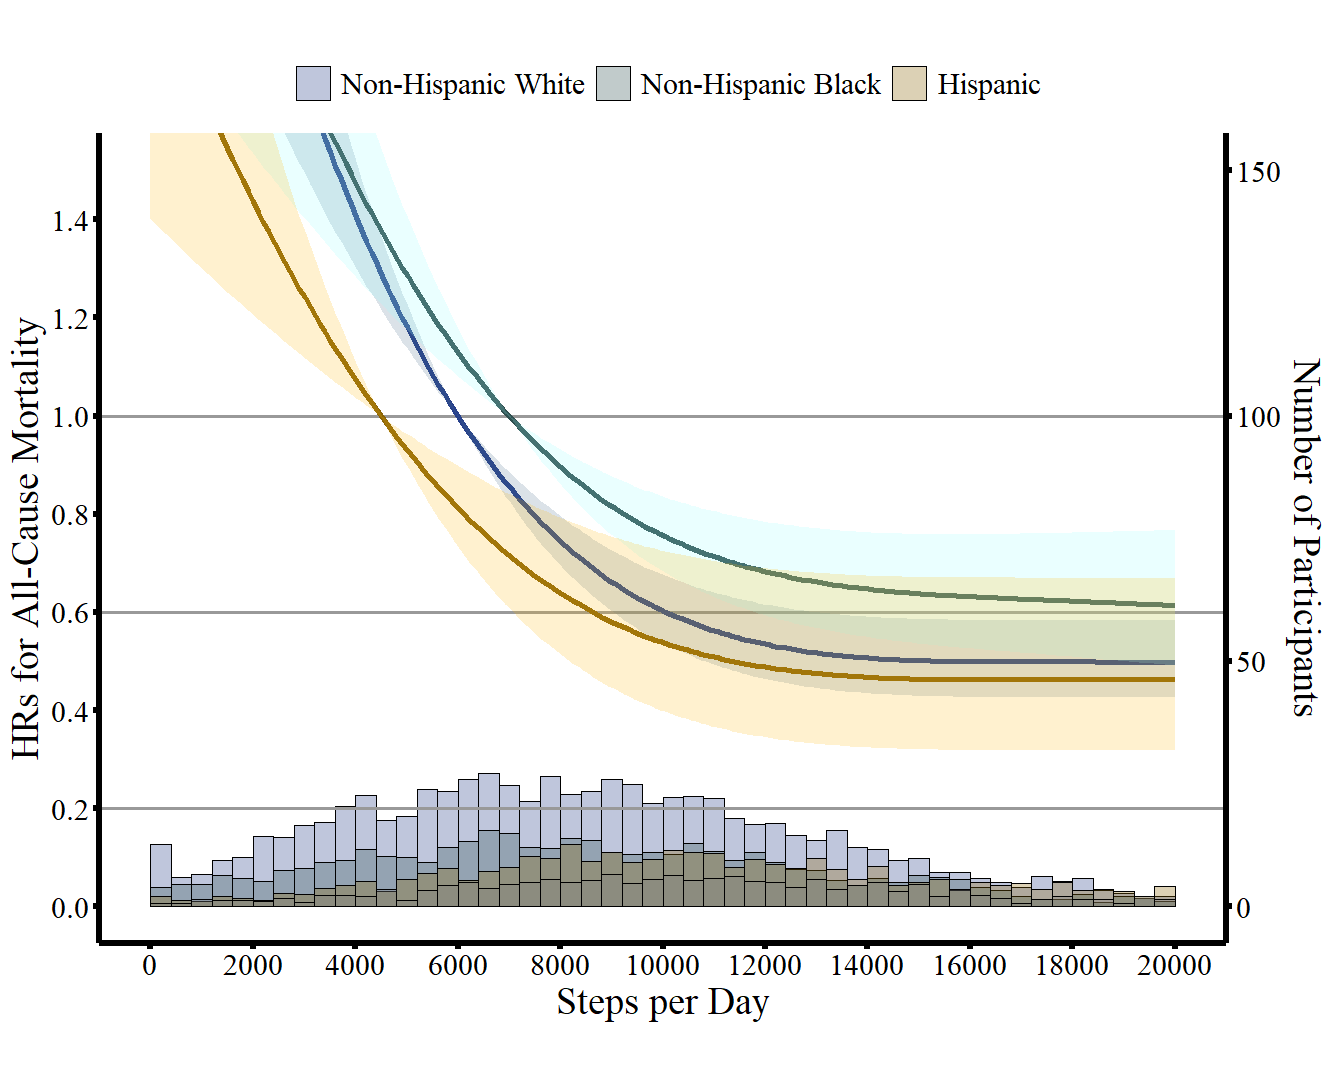


**Figure S5.** Estimates of life expectancy across age groups stratified by daily step count categories among males aged 40 and over.


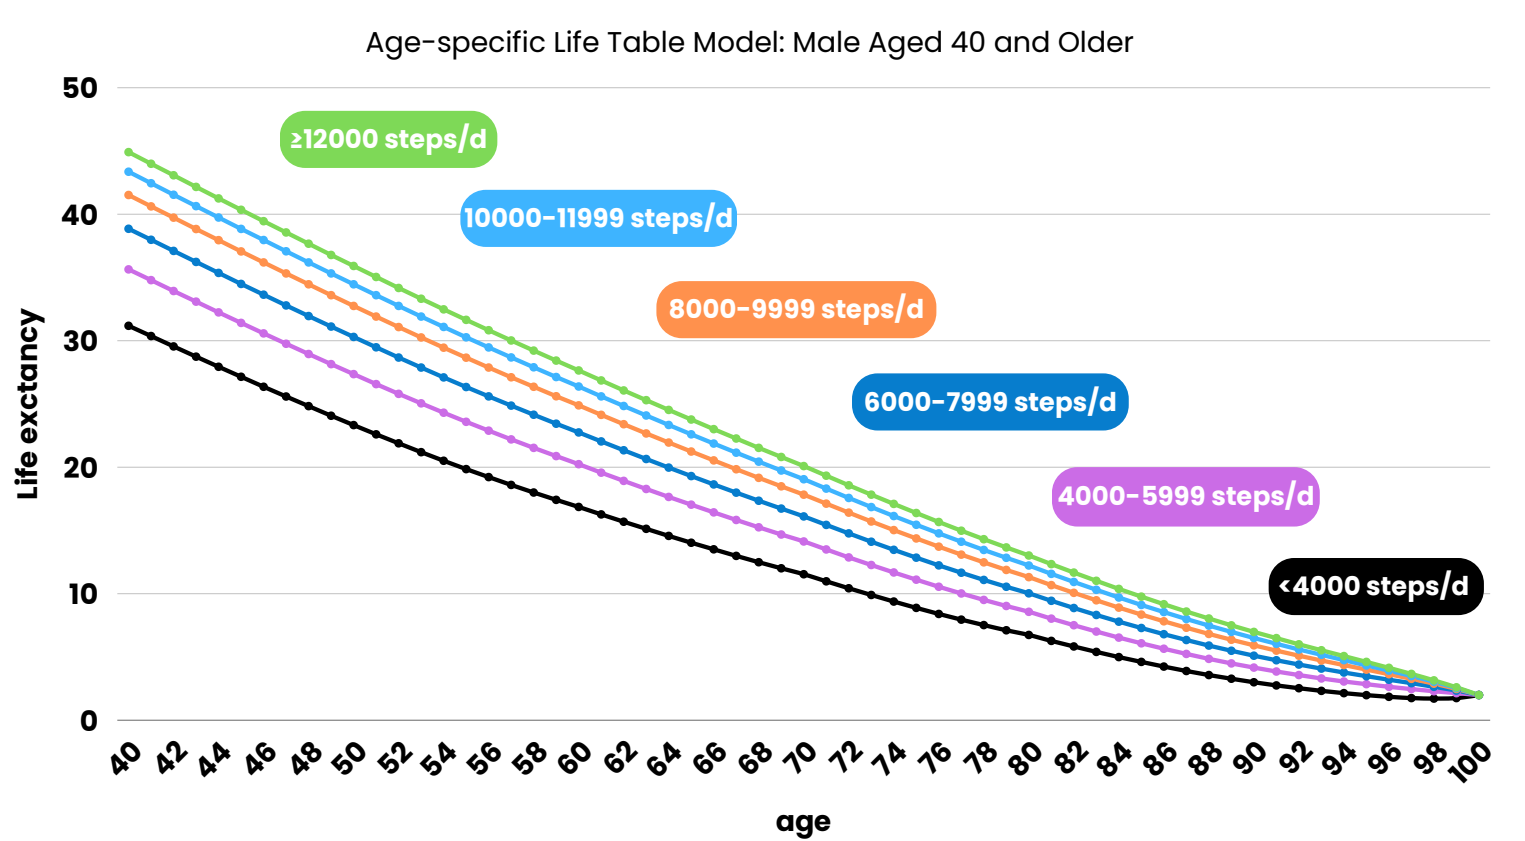


**Figure S6.** Estimates of life expectancy across age groups stratified by daily step count categories among females aged 40 and over.


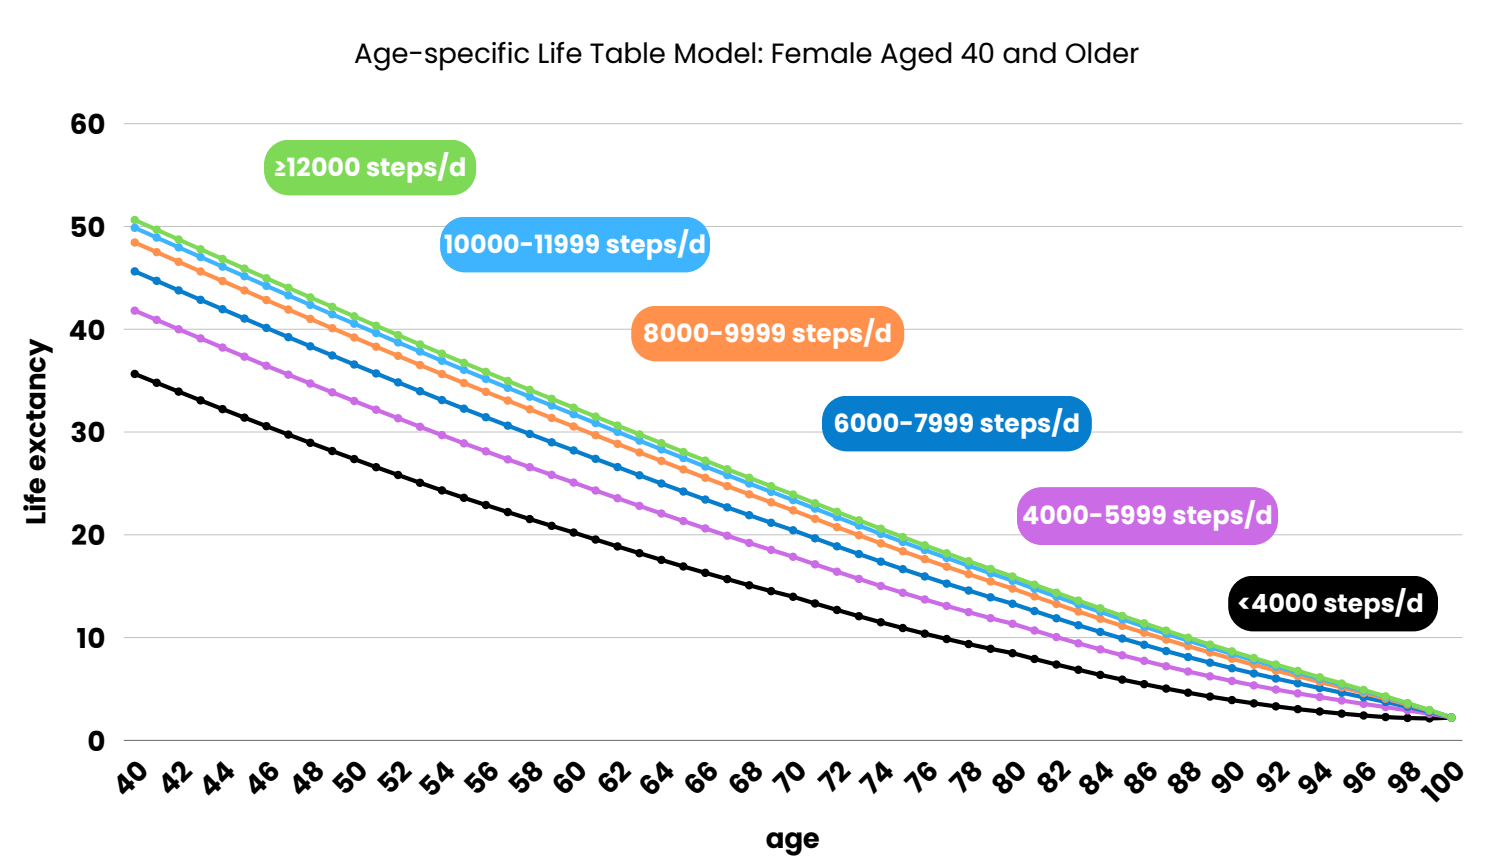


**Figure S7.** Estimates of life expectancy across age groups stratified by daily step count categories among Non-Hispanic White participants aged 40 and over.


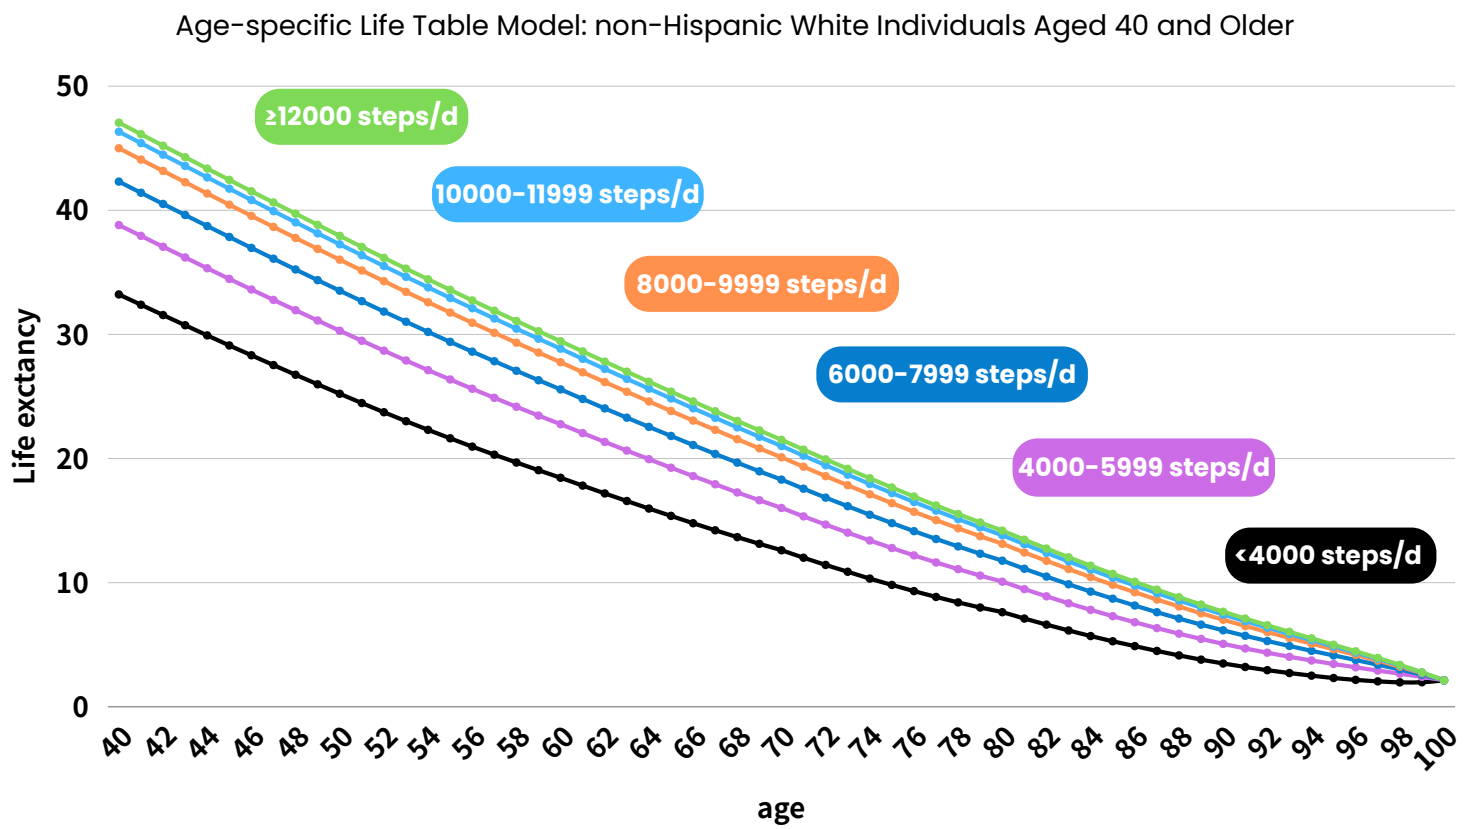


**Figure S8.** Estimates of life expectancy across age groups stratified by daily step count categories among Non-Hispanic Black participants aged 40 and over.


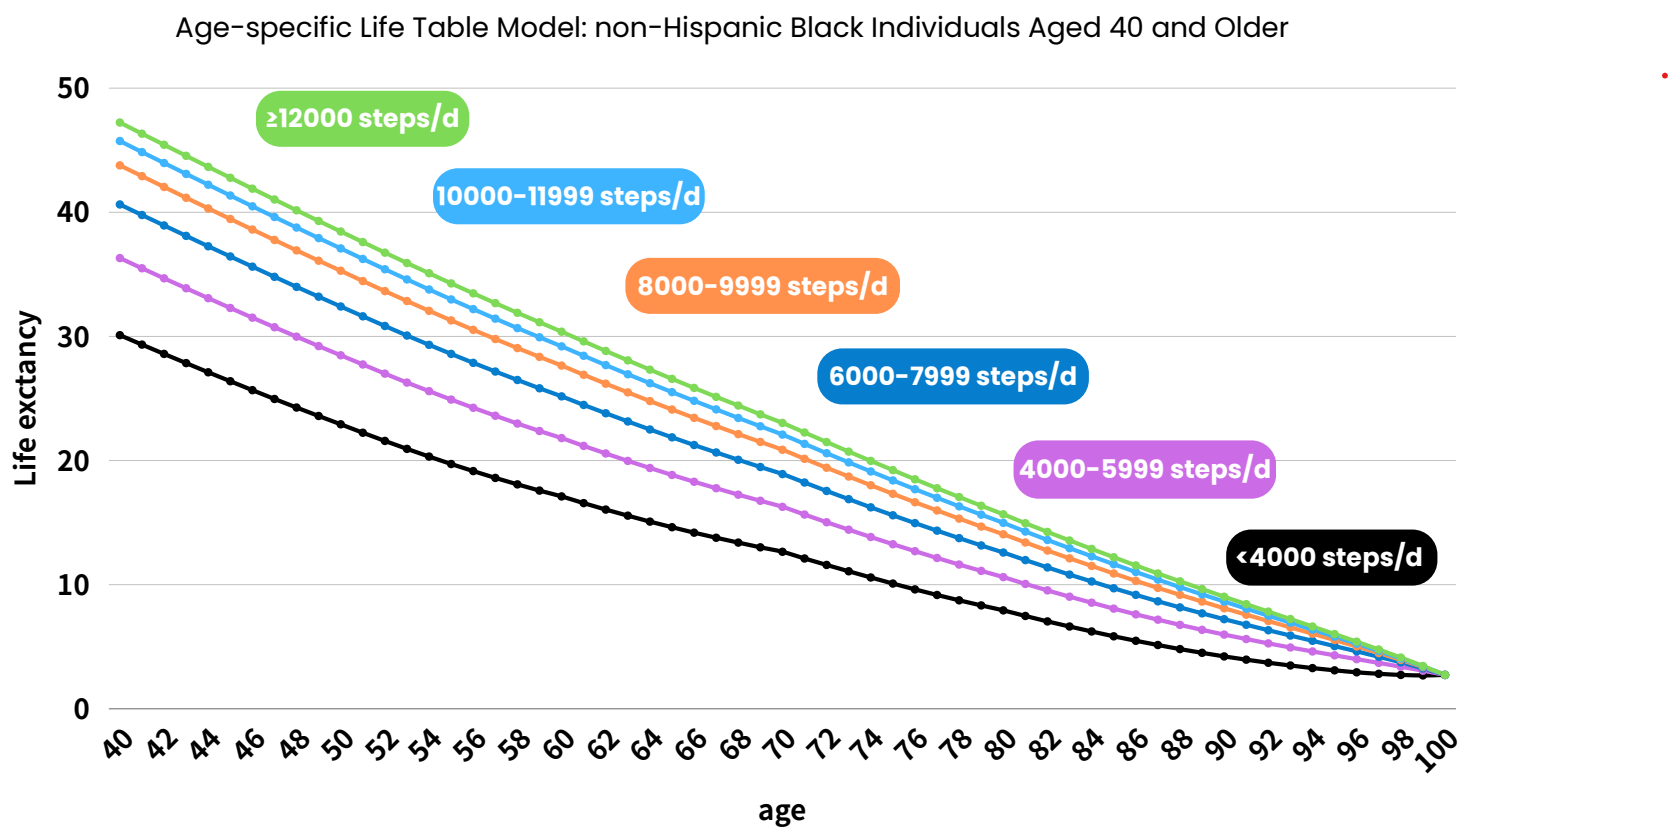


**Figure S9.** Estimates of life expectancy across age groups stratified by daily step count categories among Hispanic participants aged 40 and over.


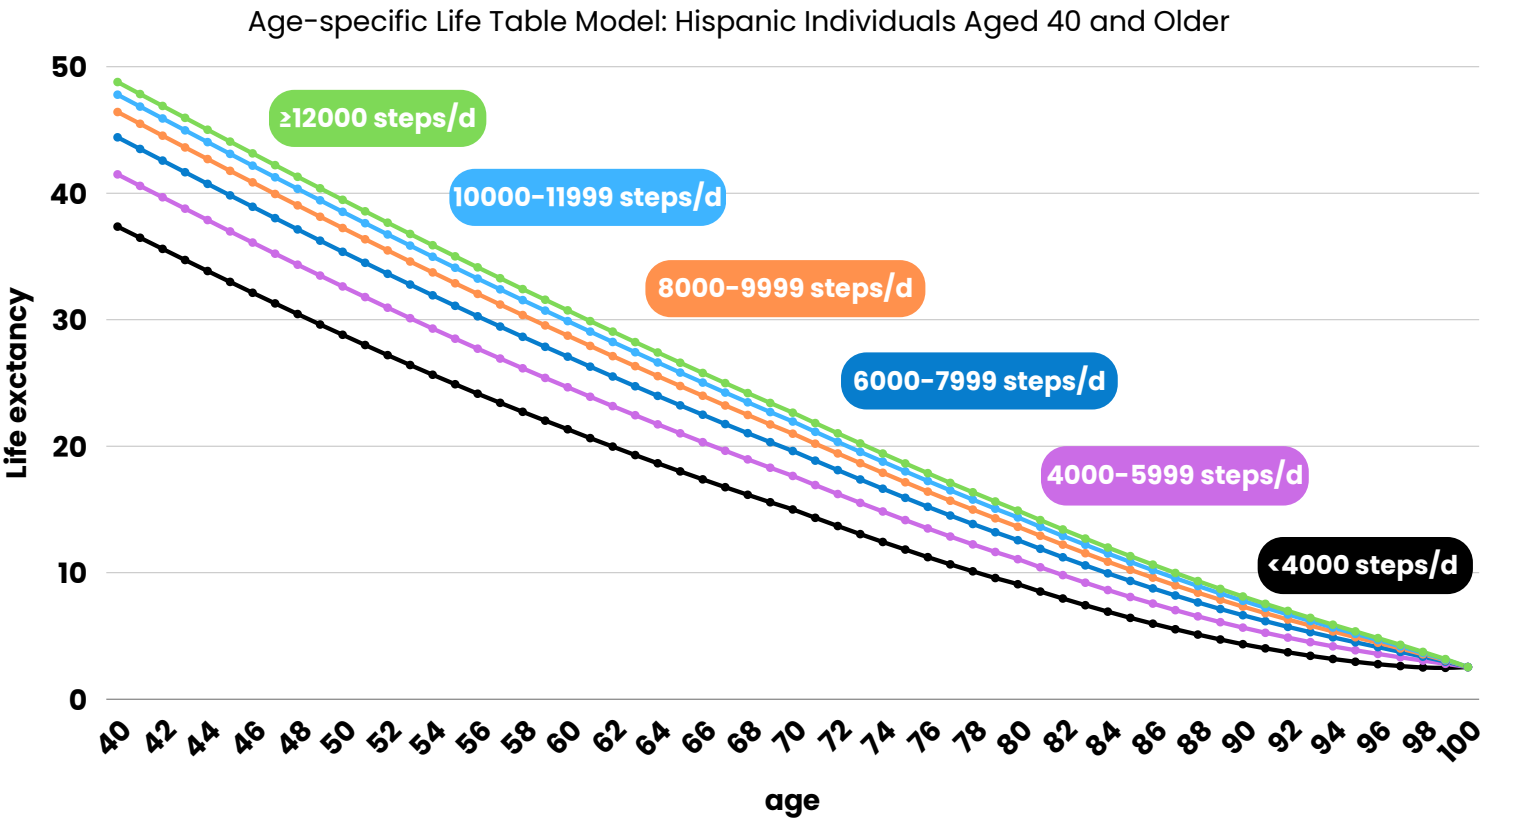


**Figure S10.** Sensitive analyses 1: Estimates of life expectancy across age groups stratified by daily step count, calculated using the Verisense 2 algorithm, among participants aged 40 and older.

**
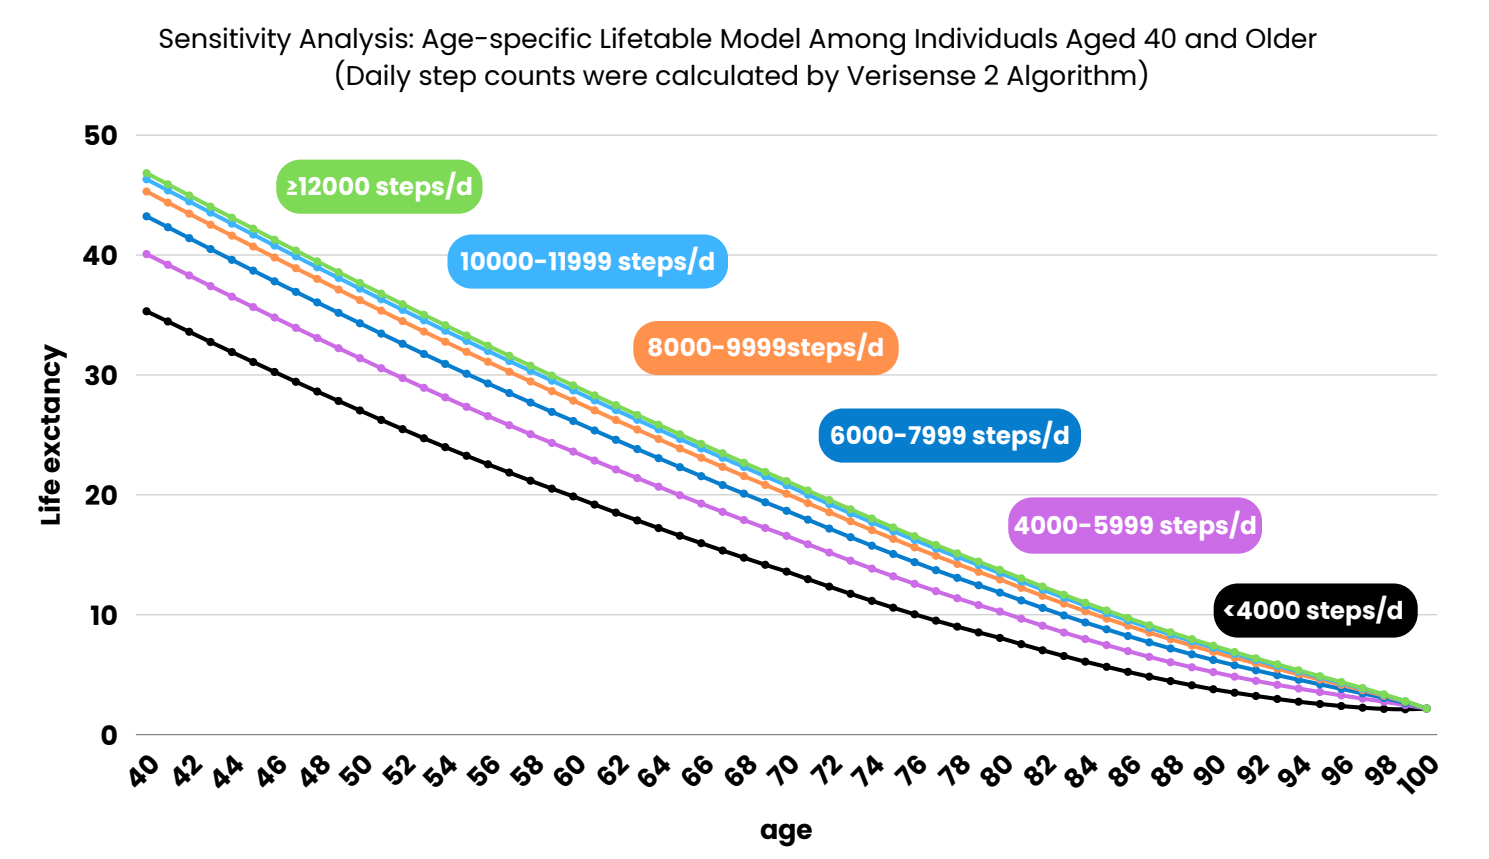
**

**Figure S11.** Sensitive analyses 2: Estimates of life expectancy across age groups stratified by daily step count, following Multiple Imputation by Chained Equations (MICE) to address missing covariate data.

**
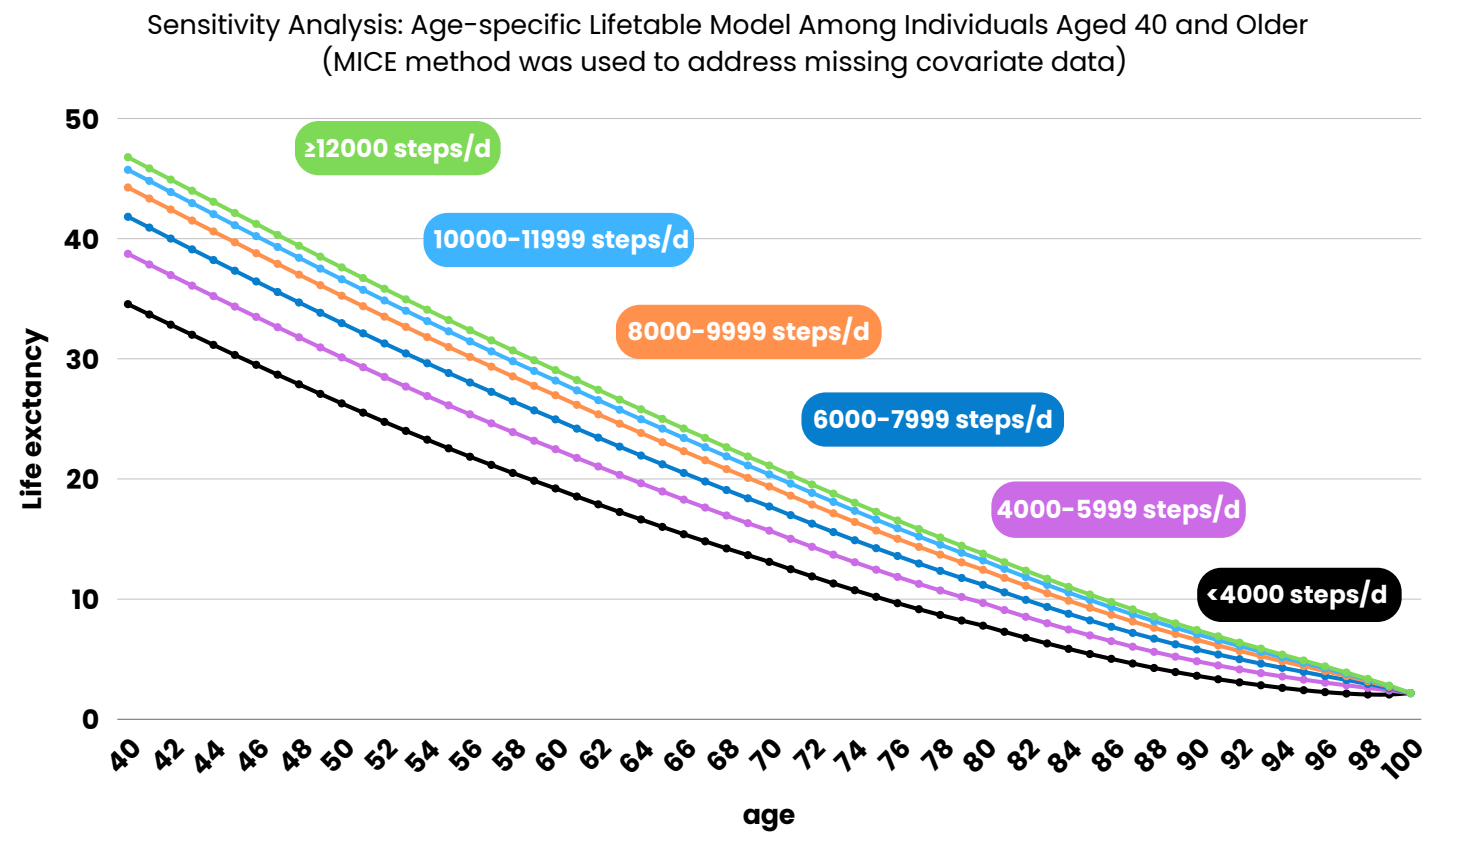
**

**Figure S12.** Sensitive analyses 3: Estimates of life expectancy across age groups stratified by daily step count, including only participants with at least four days of valid accelerometer wear time.

**
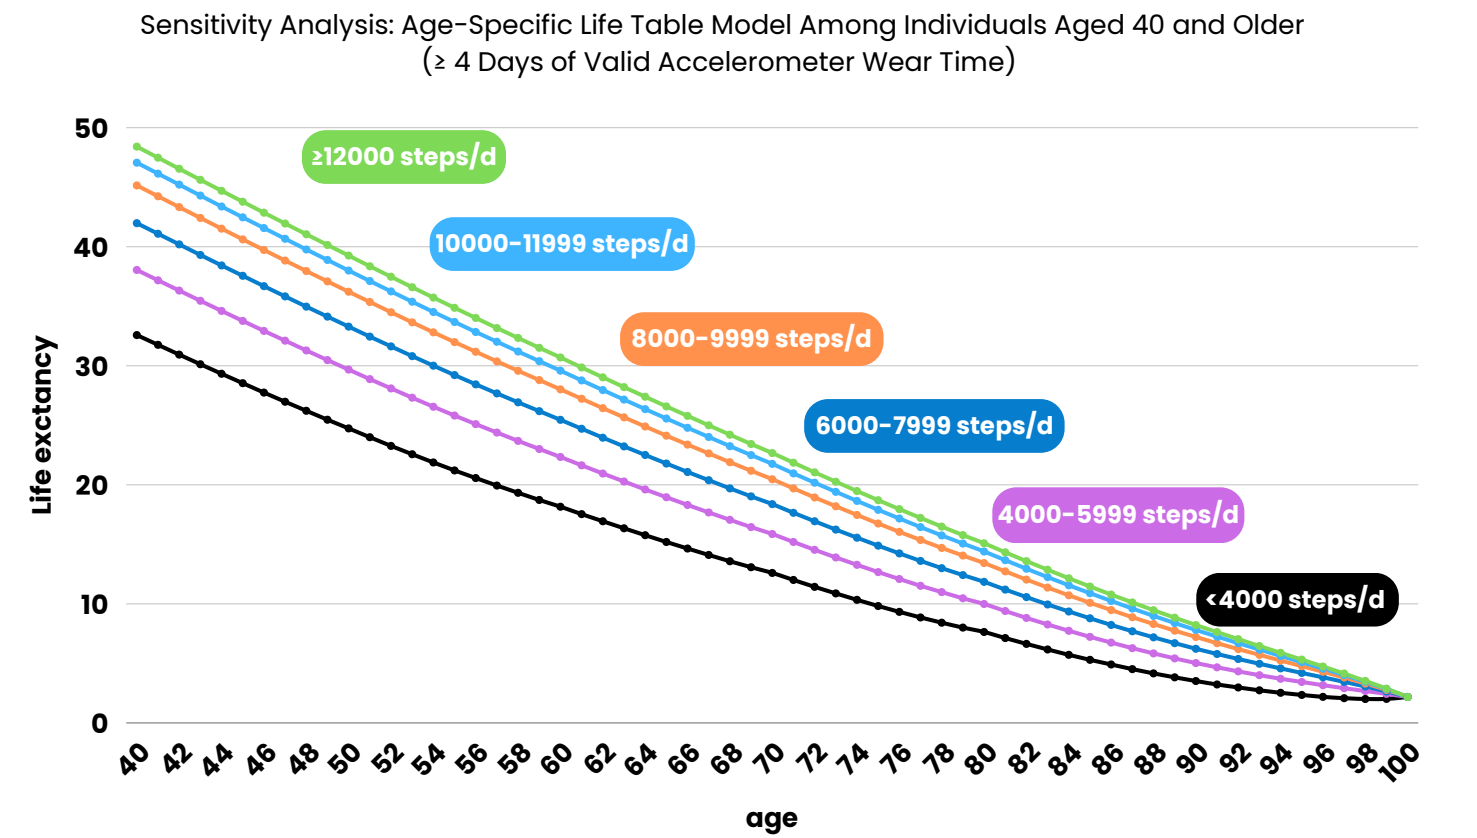
**
