# Supplementary material for: Daily steps and life expectancy: a life table analysis of NHANES 2005-2006 and 2011-2014
Source: Research Square preprint supplement (doi:10.21203/rs.3.rs-7654206/v1), 2025-10-15
Supplement: Supplementary file 2 [file e0af20ed4bc1396250a071eb.xlsx]

## Sheet: all-cause mortality 
Population percentage of different age groups (Pa0)			Exposure group		Adujsted hazard ration (HRaj, j=0,1,2,3,4,5)
Age-group	Percentage		steps group	Median	Model 1	95% CI	Model 2	95% CI	Model 3	95% CI
40-50	0.382913		<4000	2548	1	/	1	/	1	/
50-60	0.395784		4000-5999	5089	0.575607	0.54-0.62	0.586651	0.54-0.63	0.638996	0.58-0.70
60-70	0.453513		6000-7999	6998	0.394559	0.35-0.44	0.407398	0.36-0.46	0.470433	0.41-0.55
70-80	0.579687		8000-9999	8975	0.288774	0.25-0.34	0.301413	0.25-0.36	0.365222	0.30-0.45
>80	0.750666		10000-11999	10919	0.237142	0.20-0.28	0.24924	0.21-0.30	0.311269	0.25-0.39
			>=12000	15175	0.204819	0.17-0.25	0.216463	0.17-0.27	0.276282	0.21-0.36

## Sheet: Lifetable model
Age (years)	<4000 step (reference group)	4000-5999	6000-7999	8000-9999	10000-11999	>=12000
40	33.2566	38.6808	42.3152	45.1814	46.8934	48.1101
41	32.4225	37.8042	41.4145	44.2638	45.9663	47.1765
42	31.5918	36.9304	40.5163	43.3482	45.0411	46.2446
43	30.7664	36.0609	39.6217	42.4358	44.1186	45.3153
44	29.9484	35.1972	38.732	41.5275	43.1999	44.3894
45	29.139	34.3403	37.848	40.6241	42.2856	43.4675
46	28.3388	33.4909	36.9702	39.7259	41.3759	42.55
47	27.5485	32.6492	36.0989	38.8333	40.4713	41.637
48	26.7687	31.8159	35.2347	37.9467	39.572	40.729
49	26.0003	30.9918	34.3781	37.0666	38.6786	39.8264
50	25.2449	30.1781	33.5302	36.1939	37.7918	38.9299
51	24.4944	29.3685	32.686	35.3245	36.908	38.0361
52	23.7577	28.5702	31.8512	34.4632	36.0314	37.149
53	23.0377	27.7852	31.0276	33.6114	35.1635	36.2699
54	22.337	27.0156	30.217	32.7706	34.3055	35.3999
55	21.6561	26.2619	29.4197	31.9412	33.4577	34.5393
56	20.9941	25.5234	28.6352	31.1229	32.6198	33.6878
57	20.3494	24.7989	27.8626	30.3146	31.7911	32.8448
58	19.7214	24.0879	27.1015	29.5163	30.9713	32.01
59	19.1102	23.3906	26.352	28.728	30.1605	31.1836
60	18.5164	22.7074	25.6144	27.9499	29.3591	30.3658
61	17.8857	21.9961	24.8539	27.1527	28.5406	29.5324
62	17.2694	21.2969	24.1039	26.3646	27.7304	28.7067
63	16.6666	20.609	23.3636	25.585	26.9279	27.8881
64	16.0756	19.9311	22.6322	24.8132	26.1325	27.0762
65	15.4959	19.2629	21.9091	24.0488	25.3438	26.2705
66	14.9276	18.6046	21.1947	23.2919	24.5622	25.4713
67	14.374	17.9585	20.4911	22.5445	23.7891	24.6801
68	13.8357	17.3254	19.7986	21.8069	23.0249	23.8971
69	13.3147	16.7066	19.1186	21.0802	22.2706	23.1234
70	12.8139	16.1044	18.4529	20.3659	21.5277	22.3602
71	12.2174	15.4273	17.7249	19.5988	20.7374	21.5535
72	11.6324	14.7609	17.0067	18.8404	19.9552	20.7544
73	11.0697	14.1139	16.3055	18.0972	19.1869	19.9682
74	10.5224	13.4807	15.6169	17.3651	18.4288	19.1916
75	9.99665	12.8667	14.9452	16.6481	17.6846	18.4279
76	9.49116	12.2706	14.2895	15.9454	16.9535	17.6764
77	9.01277	11.698	13.6547	15.261	16.2392	16.9407
78	8.56203	11.1491	13.0408	14.5951	15.5418	16.2207
79	8.13832	10.6233	12.4471	13.9471	14.8608	15.5158
80	7.74642	10.1239	11.8764	13.3193	14.1982	14.8281
81	7.23264	9.52677	11.2232	12.6206	13.4716	14.0814
82	6.73994	8.94989	10.5887	11.939	12.7609	13.3496
83	6.26817	8.39341	9.97325	11.2746	12.0661	12.6327
84	5.81612	7.85667	9.37632	10.6271	11.3871	11.9307
85	5.39226	7.34695	8.80431	10.0022	10.7289	11.248
86	4.98923	6.85829	8.25207	9.39521	10.0873	10.581
87	4.59935	6.38465	7.71442	8.80167	9.45815	9.92562
88	4.23591	5.93756	7.20139	8.23024	8.84931	9.28915
89	3.8985	5.51672	6.71252	7.68029	8.26007	8.67083
90	3.58666	5.12162	6.24699	7.15082	7.68931	8.06951
91	3.2999	4.75148	5.80361	6.64031	7.13541	7.48353
92	3.03784	4.40528	5.38065	6.14664	6.59613	6.91058
93	2.80029	4.08164	4.97576	5.66698	6.06848	6.34765
94	2.58752	3.77876	4.58578	5.19755	5.54852	5.7908
95	2.40071	3.49428	4.20649	4.73338	5.03118	5.235
96	2.24279	3.22507	3.83219	4.26801	4.50995	4.67386
97	2.12005	2.9668	3.45518	3.79298	3.97649	4.09932
98	2.04557	2.71335	3.06492	3.2972	3.42014	3.50125
99	2.04645	2.45569	2.64677	2.76604	2.8272	2.86686
100	2.18006	2.18006	2.18006	2.18006	2.18006	2.18006

## Sheet: Original lifetable from CDC
Life table for the total population: United States, 2019
Age (years)	Probability of dying between ages x and x + 1	Number surviving to age x	Number dying between ages x and x + 1	Person-years lived between ages x and x + 1	Total number of person-years lived above age x	Expectation of life at age x
	qx	lx	dx	Lx	Tx	ex
0–1	0.00565023	100000	565.023	99505	7.87375e+06	78.7375
1–2	0.000366582	99435	36.4511	99416.8	7.77424e+06	78.1842
2–3	0.000263801	99398.5	26.2214	99385.4	7674827	77.2127
3–4	0.000187124	99372.3	18.5949	99363	7.57544e+06	76.2329
4–5	0.000147849	99353.7	14.6894	99346.4	7.47608e+06	75.2471
5–6	0.00014155	99339	14.0614	99332	7376732	74.2581
6–7	0.000125895	99325	12.5046	99318.7	7277400	73.2686
7–8	0.000113558	99312.5	11.2778	99306.8	7.17808e+06	72.2778
8–9	0.000102613	99301.2	10.1896	99296.1	7.07877e+06	71.2859
9–10	9.39009e-05	99291	9.32351	99286.3	6.97948e+06	70.2932
10–11	9.10752e-05	99281.7	9.0421	99277.1	6880192	69.2997
11–12	0.000100119	99272.6	9.93904	99267.7	6780915	68.306
12–13	0.000127964	99262.7	12.7021	99256.3	6.68165e+06	67.3128
13–14	0.00017871	99250	17.737	99241.1	6582391	66.3213
14–15	0.00024785	99232.2	24.5947	99220	6483150	65.3331
15–16	0.000325381	99207.7	32.2803	99191.5	6383930	64.3492
16–17	0.000405191	99175.4	40.1849	99155.3	6.28474e+06	63.3699
17–18	0.000489362	99135.2	48.5129	99110.9	6185583	62.3954
18–19	0.000575303	99086.7	57.0048	99058.2	6.08647e+06	61.4257
19–20	0.00066132	99029.7	65.4903	98996.9	5987414	60.4608
20–21	0.000749731	98964.2	74.1965	98927.1	5888417	59.5005
21–22	0.000837221	98890	82.7928	98848.6	5789490	58.5448
22–23	0.000914907	98807.2	90.3994	98762	5.69064e+06	57.5934
23–24	0.000977909	98716.8	96.5361	98668.5	5.59188e+06	56.6457
24–25	0.0010287	98620.2	101.451	98569.5	5493211	55.7006
25–26	0.00107479	98518.8	105.887	98465.9	5.39464e+06	54.7575
26–27	0.00112025	98412.9	110.247	98357.8	5.29618e+06	53.8159
27–28	0.00116386	98302.7	114.411	98245.5	5197818	52.8757
28–29	0.00120862	98188.2	118.673	98128.9	5.09957e+06	51.9367
29–30	0.00125633	98069.6	123.208	98008	5.00144e+06	50.9989
30–31	0.00130575	97946.4	127.893	97882.4	4.90344e+06	50.0625
31–32	0.00135732	97818.5	132.771	97752.1	4805553	49.1273
32–33	0.00141385	97685.7	138.113	97616.6	4707801	48.1934
33–34	0.00147479	97547.6	143.862	97475.7	4.61018e+06	47.2609
34–35	0.00153832	97403.7	149.838	97328.8	4512709	46.3299
35–36	0.0016105	97253.9	156.627	97175.6	4415380	45.4005
36–37	0.00168586	97097.3	163.693	97015.4	4.3182e+06	44.473
37–38	0.00175296	96933.6	169.921	96848.6	4221189	43.5472
38–39	0.00180938	96763.6	175.082	96676.1	4.12434e+06	42.6228
39–40	0.00186441	96588.6	180.081	96498.5	4.02766e+06	41.6992
40–41	0.00192998	96408.5	186.066	96315.5	3.93117e+06	40.7761
41–42	0.00201972	96222.4	194.343	96125.2	3.83485e+06	39.854
42–43	0.00213866	96028.1	205.371	95925.4	3738725	38.9337
43–44	0.00228852	95822.7	219.292	95713.1	3.6428e+06	38.016
44–45	0.00246201	95603.4	235.376	95485.7	3.54709e+06	37.1021
45–46	0.00265398	95368	253.105	95241.5	3.4516e+06	36.1924
46–47	0.00286283	95114.9	272.298	94978.8	3.35636e+06	35.2874
47–48	0.00309136	94842.6	293.192	94696	3.26138e+06	34.3873
48–49	0.00334694	94549.4	316.451	94391.2	3.16668e+06	33.4924
49–50	0.00363784	94233	342.805	94061.6	3.07229e+06	32.6032
50–51	0.00394988	93890.2	370.855	93704.8	2.97823e+06	31.7204
51–52	0.00429675	93519.3	401.829	93318.4	2884527	30.8442
52–53	0.00470865	93117.5	438.457	92898.3	2.79121e+06	29.9751
53–54	0.00518577	92679	480.612	92438.7	2.69831e+06	29.1146
54–55	0.00570106	92198.4	525.629	91935.6	2.60587e+06	28.2637
55–56	0.00622336	91672.8	570.513	91387.5	2.51394e+06	27.4229
56–57	0.00674426	91102.3	614.418	90795.1	2.42255e+06	26.5915
57–58	0.00728101	90487.9	658.843	90158.5	2.33175e+06	25.7687
58–59	0.00784787	89829	704.967	89476.5	2.24159e+06	24.954
59–60	0.00845371	89124.1	753.429	88747.3	2.15212e+06	24.1474
60–61	0.00910894	88370.6	804.962	87968.2	2.06337e+06	23.3491
61–62	0.00979457	87565.7	857.668	87136.8	1.9754e+06	22.5591
62–63	0.0104919	86708	909.735	86253.1	1.88827e+06	21.7773
63–64	0.0111919	85798.3	960.245	85318.2	1.80201e+06	21.0029
64–65	0.0119154	84838	1010.88	84332.6	1.71669e+06	20.235
65–66	0.0126915	83827.2	1063.89	83295.2	1632362	19.4729
66–67	0.01361	82763.3	1126.41	82200.1	1.54907e+06	18.7168
67–68	0.0146061	81636.9	1192.4	81040.7	1.46687e+06	17.9682
68–69	0.0157241	80444.5	1264.91	79812	1.38583e+06	17.2271
69–70	0.0170036	79179.5	1346.34	78506.4	1.30601e+06	16.4943
70–71	0.0183914	77833.2	1431.46	77117.5	1.22751e+06	15.771
71–72	0.0198306	76401.7	1515.09	75644.2	1.15039e+06	15.0571
72–73	0.0219133	74886.6	1641.01	74066.1	1074746	14.3516
73–74	0.0238043	73245.6	1743.56	72373.9	1.00068e+06	13.662
74–75	0.0261926	71502.1	1872.83	70565.7	928306	12.9829
75–76	0.0286916	69629.2	1997.77	68630.4	857740	12.3187
76–77	0.0317857	67631.5	2149.72	66556.6	789110	11.6678
77–78	0.0351355	65481.8	2300.73	64331.4	722553	11.0344
78–79	0.0386728	63181	2443.39	61959.3	658222	10.418
79–80	0.0427466	60737.6	2596.33	59439.5	596263	9.81702
80–81	0.0472006	58141.3	2744.31	56769.2	536823	9.23308
81–82	0.0525993	55397	2913.84	53940.1	480054	8.6657
82–83	0.0585863	52483.2	3074.79	50945.8	426114	8.11906
83–84	0.0651236	49408.4	3217.65	47799.5	375168	7.59321
84–85	0.0733997	46190.7	3390.39	44495.5	327369	7.08732
85–86	0.0816365	42800.3	3494.07	41053.3	282873	6.60913
86–87	0.089815	39306.3	3530.29	37541.1	241820	6.1522
87–88	0.100898	35776	3609.73	33971.1	204279	5.70994
88–89	0.113081	32166.2	3637.38	30347.6	170308	5.29461
89–90	0.126406	28528.9	3606.21	26725.8	139960	4.90591
90–91	0.140901	24922.7	3511.63	23166.8	113234	4.54343
91–92	0.156577	21411	3352.47	19734.8	90067.4	4.20659
92–93	0.173422	18058.6	3131.75	16492.7	70332.6	3.8947
93–94	0.191399	14926.8	2856.97	13498.3	53840	3.60693
94–95	0.210444	12069.8	2540.02	10799.8	40341.6	3.34235
95–96	0.230465	9529.81	2196.29	8431.67	29541.8	3.09994
96–97	0.251342	7333.52	1843.22	6411.91	21110.1	2.87858
97–98	0.272927	5490.3	1498.45	4741.07	14698.2	2.67713
98–99	0.295049	3991.84	1177.79	3402.95	9957.16	2.49438
99–100	0.317517	2814.06	893.512	2367.3	6554.21	2.3291
100 and over	1	1920.54	1920.54	4186.91	4186.91	2.18006
SOURCE: National Center for Health Statistics, National Vital Statistics System, Mortality.
				The sum of person-years lived among ages 100–120 (L100-120)	4186.9
Age (years)	Mortality between ages x and x + 1	Probability of dying between ages x and x + 1	Number surviving to age x	Number dying between ages x and x + 1	Person-years lived between ages x and x + 1	Total number of person-years lived above age x	Expectation of life at age x
	Mx	qx	lx	dx	Lx	Tx	ex
99	0.37744	0.317518	2814.06	893.512	2557.32	7253.08	2.39834
100	0.40983	0.340132	1920.54	653.238	1593.93	4186.9	2.18006
101	0.443021	0.362683	1267.31	459.63	1037.49	2592.98	2.04605
102	0.476729	0.384967	807.676	310.928	652.212	1555.49	1.92588
103	0.51065	0.406787	496.748	202.071	395.713	903.275	1.81838
104	0.544474	0.427966	294.677	126.112	231.621	507.563	1.72244
105	0.577892	0.448344	168.565	75.5754	130.778	275.941	1.637
106	0.610612	0.467792	92.9901	43.5	71.2401	145.164	1.56106
107	0.642365	0.486204	49.4901	24.0623	37.4589	73.9235	1.4937
108	0.672916	0.503507	25.4278	12.8031	19.0262	36.4646	1.43404
109	0.702067	0.519652	12.6247	6.56046	9.34449	17.4383	1.38128
110	0.729664	0.534618	6.06426	3.24206	4.44323	8.09384	1.33468
111	0.755595	0.548408	2.82219	1.54771	2.04834	3.65061	1.29354
112	0.779789	0.561042	1.27448	0.715037	0.916962	1.60227	1.2572
113	0.802215	0.572558	0.559444	0.320314	0.399287	0.685312	1.22499
114	0.822876	0.583005	0.23913	0.139414	0.169423	0.286025	1.19611
115	0.841804	0.592444	0.0997158	0.059076	0.0701778	0.116603	1.16935
116	0.859056	0.600937	0.0406398	0.024422	0.0284288	0.0464249	1.14235
117	0.874707	0.608554	0.0162179	0.00986943	0.0112831	0.017996	1.10964
118	0.888844	0.615363	0.00634842	0.00390658	0.00439512	0.00671291	1.05742
119	0.901566	0.621434	0.00244183	0.00151744	0.00168311	0.00231779	0.9492
120	0.912975	0.626833	0.000924395	0.000579441	0.000634674	0.000634674	0.686583

## Sheet: Age 40-100 (created by author)
Age interval (between x and x+1)	Probability of dying between ages x and x + 1	Number surviving to age x	Number dying between ages x and x + 1	Person-years lived between ages x and x + 1	Total number of person-years lived above age x	Expectation of life at age x		Original population mortality rates from CDC (IRa)
	qx	lx	dx	Lx	Tx	ex
40–41	0.00192998	100000	192.998	99903.5	4.07761e+06	40.7761		0.00192998
41–42	0.00201972	99807	201.582	99706.2	3.97771e+06	39.854		0.00201972
42–43	0.00213866	99605.4	213.022	99498.9	3.878e+06	38.9337		0.00213866
43–44	0.00228852	99392.4	227.462	99278.7	3.77851e+06	38.016		0.00228852
44–45	0.00246201	99164.9	244.145	99042.9	3.67923e+06	37.1021		0.00246201
45–46	0.00265398	98920.8	262.534	98789.5	3.58018e+06	36.1924		0.00265398
46–47	0.00286283	98658.3	282.442	98517	3.48139e+06	35.2874		0.00286283
47–48	0.00309136	98375.8	304.115	98223.8	3.38288e+06	34.3873		0.00309136
48–49	0.00334694	98071.7	328.24	97907.6	3.28465e+06	33.4924		0.00334694
49–50	0.00363784	97743.5	355.575	97565.7	3.18675e+06	32.6032		0.00363784
50–51	0.00394988	97387.9	384.67	97195.6	3.08918e+06	31.7204		0.00394988
51–52	0.00429675	97003.2	416.798	96794.8	2.99198e+06	30.8442		0.00429675
52–53	0.00470865	96586.4	454.791	96359	2.89519e+06	29.9751		0.00470865
53–54	0.00518577	96131.6	498.516	95882.4	2.79883e+06	29.1146		0.00518577
54–55	0.00570106	95633.1	545.21	95360.5	2.70295e+06	28.2637		0.00570106
55–56	0.00622336	95087.9	591.766	94792	2.60759e+06	27.4229		0.00622336
56–57	0.00674426	94496.1	637.307	94177.5	2.5128e+06	26.5915		0.00674426
57–58	0.00728101	93858.8	683.387	93517.1	2.41862e+06	25.7687		0.00728101
58–59	0.00784787	93175.4	731.229	92809.8	2.3251e+06	24.954		0.00784787
59–60	0.00845371	92444.2	781.497	92053.5	2.23229e+06	24.1474		0.00845371
60–61	0.00910894	91662.7	834.95	91245.2	2.14024e+06	23.3491		0.00910894
61–62	0.00979457	90827.8	889.619	90383	2.04899e+06	22.5591		0.00979457
62–63	0.0104919	89938.1	943.626	89466.3	1.95861e+06	21.7773		0.0104919
63–64	0.0111919	88994.5	996.017	88496.5	1.86914e+06	21.0029		0.0111919
64–65	0.0119154	87998.5	1048.53	87474.2	1.78065e+06	20.235		0.0119154
65–66	0.0126915	86950	1103.52	86398.2	1.69317e+06	19.473		0.0126915
66–67	0.01361	85846.4	1168.37	85262.3	1.60677e+06	18.7168		0.01361
67–68	0.0146061	84678.1	1236.82	84059.7	1.52151e+06	17.9682		0.0146061
68–69	0.0157241	83441.3	1312.03	82785.2	1.43745e+06	17.2271		0.0157241
69–70	0.0170036	82129.2	1396.49	81431	1.35467e+06	16.4943		0.0170036
70–71	0.0183914	80732.7	1484.78	79990.3	1.27324e+06	15.771		0.0183914
71–72	0.0198306	79247.9	1571.53	78462.2	1.19325e+06	15.0571		0.0198306
72–73	0.0219133	77676.4	1702.15	76825.3	1.11478e+06	14.3516		0.0219133
73–74	0.0238043	75974.3	1808.51	75070	1.03796e+06	13.662		0.0238043
74–75	0.0261926	74165.8	1942.6	73194.5	962888	12.9829		0.0261926
75–76	0.0286916	72223.2	2072.2	71187.1	889694	12.3187		0.0286916
76–77	0.0317857	70151	2229.8	69036.1	818507	11.6678		0.0317857
77–78	0.0351355	67921.2	2386.44	66727.9	749471	11.0344		0.0351355
78–79	0.0386728	65534.7	2534.41	64267.5	682743	10.418		0.0386728
79–80	0.0427466	63000.3	2693.05	61653.8	618475	9.81702		0.0427466
80–81	0.0472006	60307.3	2846.54	58884	556822	9.23308		0.0472006
81–82	0.0525993	57460.7	3022.39	55949.5	497938	8.6657		0.0525993
82–83	0.0585863	54438.3	3189.34	52843.7	441988	8.11906		0.0585863
83–84	0.0651236	51249	3337.52	49580.2	389144	7.59321		0.0651236
84–85	0.0733997	47911.5	3516.69	46153.1	339564	7.08732		0.0733997
85–86	0.0816365	44394.8	3624.23	42582.7	293411	6.60913		0.0816365
86–87	0.089815	40770.5	3661.8	38939.6	250828	6.1522		0.089815
87–88	0.100898	37108.7	3744.2	35236.6	211889	5.70994		0.100898
88–89	0.113081	33364.5	3772.88	31478.1	176652	5.29461		0.113081
89–90	0.126406	29591.7	3740.55	27721.4	145174	4.90591		0.126406
90–91	0.140901	25851.1	3642.45	24029.9	117453	4.54343		0.140901
91–92	0.156577	22208.7	3477.36	20470	93422.7	4.20659		0.156577
92–93	0.173422	18731.3	3248.41	17107.1	72952.7	3.8947		0.173422
93–94	0.191399	15482.9	2963.4	14001.2	55845.7	3.60693		0.191399
94–95	0.210444	12519.5	2634.65	11202.2	41844.5	3.34235		0.210444
95–96	0.230465	9884.83	2278.11	8745.77	30642.3	3.09993		0.230465
96–97	0.251342	7606.72	1911.89	6650.77	21896.6	2.87858		0.251342
97–98	0.272927	5694.83	1554.27	4917.69	15245.8	2.67713		0.272927
98–99	0.295049	4140.55	1221.67	3529.72	10328.1	2.49437		0.295049
99–100	0.317517	2918.89	926.798	2455.49	6798.37	2.3291		0.317517
100 and over	1	1992.09	1992.09	4342.88	4342.88	2.18006
				The sum of person-years lived among ages 100–120 (L100-120)	4342.88
Age (years)	Mortality between ages x and x + 1	Probability of dying between ages x and x + 1	Number surviving to age x	Number dying between ages x and x + 1	Person-years lived between ages x and x + 1	Total number of person-years lived above age x	Expectation of life at age x
	Mx	qx	lx	dx	Lx	Tx	ex
99	0.37744	0.317518	2918.89	926.798	2455.49	6798.37	2.3291
100	0.40983	0.340132	1992.09	677.573	1653.3	4342.88	2.18006
101	0.443021	0.362683	1314.52	476.753	1076.14	2689.58	2.04605
102	0.476729	0.384967	837.765	322.511	676.509	1613.43	1.92588
103	0.51065	0.406787	515.253	209.598	410.454	936.925	1.81838
104	0.544474	0.427966	305.655	130.81	240.25	526.471	1.72244
105	0.577892	0.448344	174.845	78.3908	135.65	286.221	1.637
106	0.610612	0.467792	96.4543	45.1205	73.894	150.571	1.56106
107	0.642365	0.486204	51.3337	24.9587	38.8544	76.6774	1.4937
108	0.672916	0.503507	26.375	13.28	19.735	37.823	1.43404
109	0.702067	0.519652	13.095	6.80485	9.6926	18.088	1.38128
110	0.729664	0.534618	6.29017	3.36284	4.60875	8.39536	1.33468
111	0.755595	0.548408	2.92733	1.60537	2.12464	3.78661	1.29354
112	0.779789	0.561042	1.32196	0.741674	0.951122	1.66196	1.2572
113	0.802215	0.572558	0.580285	0.332247	0.414161	0.710842	1.22499
114	0.822876	0.583005	0.248038	0.144608	0.175734	0.296681	1.19611
115	0.841804	0.592444	0.103431	0.0612768	0.0727922	0.120947	1.16935
116	0.859056	0.600937	0.0421538	0.0253318	0.0294879	0.0481544	1.14235
117	0.874707	0.608554	0.016822	0.0102371	0.0117035	0.0186665	1.10964
118	0.888844	0.615363	0.00658491	0.00405211	0.00455886	0.00696299	1.05742
119	0.901566	0.621434	0.0025328	0.00157397	0.00174582	0.00240413	0.9492
120	0.912975	0.626833	0.000958831	0.000601027	0.000658317	0.000658317	0.686583

## Sheet:  all <4000
Age interval (between x and x+1)	Probability of dying between ages x and x + 1	Number surviving to age x	Number dying between ages x and x + 1	Person-years lived between ages x and x + 1	Total number of person-years lived above age x	Expectation of life at age x		Original population mortality rates from CDC (IRa)	General population mortality rate for reference group (IRa0)
	qx	lx	dx	Lx	Tx	ex			IRa0 = IRa/Pa0
40–41	0.00504025	100000	504.025	99748	3.32566e+06	33.2566		0.00192998	0.00504025
41–42	0.00527462	99496	524.804	99233.6	3.22591e+06	32.4225		0.00201972	0.00527462
42–43	0.00558523	98971.2	552.777	98694.8	3.12668e+06	31.5918		0.00213866	0.00558523
43–44	0.00597661	98418.4	588.208	98124.3	3.02798e+06	30.7664		0.00228852	0.00597661
44–45	0.00642967	97830.2	629.016	97515.7	2.92986e+06	29.9484		0.00246201	0.00642967
45–46	0.00693102	97201.2	673.704	96864.3	2.83234e+06	29.139		0.00265398	0.00693102
46–47	0.00747645	96527.5	721.683	96166.6	2.73548e+06	28.3388		0.00286283	0.00747645
47–48	0.00807326	95805.8	773.465	95419.1	2.63931e+06	27.5485		0.00309136	0.00807326
48–49	0.00874073	95032.3	830.652	94617	2.54389e+06	26.7687		0.00334694	0.00874073
49–50	0.00950044	94201.7	894.957	93754.2	2.44927e+06	26.0003		0.00363784	0.00950044
50–51	0.00997988	93306.7	931.19	92841.1	2.35552e+06	25.2449		0.00394988	0.00997988
51–52	0.0108563	92375.5	1002.86	91874.1	2.26268e+06	24.4944		0.00429675	0.0108563
52–53	0.011897	91372.7	1087.06	90829.1	2.1708e+06	23.7577		0.00470865	0.011897
53–54	0.0131025	90285.6	1182.97	89694.1	2.07998e+06	23.0377		0.00518577	0.0131025
54–55	0.0144045	89102.6	1283.48	88460.9	1.99028e+06	22.337		0.00570106	0.0144045
55–56	0.0157241	87819.2	1380.88	87128.7	1.90182e+06	21.6561		0.00622336	0.0157241
56–57	0.0170403	86438.3	1472.93	85701.8	1.81469e+06	20.9941		0.00674426	0.0170403
57–58	0.0183964	84965.3	1563.06	84183.8	1.72899e+06	20.3494		0.00728101	0.0183964
58–59	0.0198287	83402.3	1653.76	82575.4	1.64481e+06	19.7214		0.00784787	0.0198287
59–60	0.0213594	81748.5	1746.1	80875.5	1.56223e+06	19.1102		0.00845371	0.0213594
60–61	0.0200853	80002.4	1606.87	79199	1.48136e+06	18.5164		0.00910894	0.0200853
61–62	0.0215971	78395.6	1693.12	77549	1.40216e+06	17.8857		0.00979457	0.0215971
62–63	0.0231348	76702.4	1774.5	75815.2	1.32461e+06	17.2694		0.0104919	0.0231348
63–64	0.0246782	74927.9	1849.09	74003.4	1.24879e+06	16.6666		0.0111919	0.0246782
64–65	0.0262735	73078.9	1920.04	72118.8	1.17479e+06	16.0756		0.0119154	0.0262735
65–66	0.0279848	71158.8	1991.37	70163.1	1.10267e+06	15.4959		0.0126915	0.0279848
66–67	0.0300103	69167.5	2075.73	68129.6	1.03251e+06	14.9276		0.01361	0.0300103
67–68	0.0322066	67091.7	2160.79	66011.3	964377	14.374		0.0146061	0.0322066
68–69	0.0346717	64930.9	2251.27	63805.3	898366	13.8357		0.0157241	0.0346717
69–70	0.0374932	62679.7	2350.06	61504.6	834561	13.3147		0.0170036	0.0374932
70–71	0.0317263	60329.6	1914.04	59372.6	773056	12.8139		0.0183914	0.0317263
71–72	0.0342091	58415.6	1998.35	57416.4	713683	12.2174		0.0198306	0.0342091
72–73	0.0378019	56417.2	2132.68	55350.9	656267	11.6324		0.0219133	0.0378019
73–74	0.041064	54284.5	2229.14	53170	600916	11.0697		0.0238043	0.041064
74–75	0.0451841	52055.4	2352.07	50879.4	547746	10.5224		0.0261926	0.0451841
75–76	0.0494949	49703.3	2460.06	48473.3	496867	9.99665		0.0286916	0.0494949
76–77	0.0548325	47243.3	2590.47	45948	448394	9.49116		0.0317857	0.0548325
77–78	0.0606111	44652.8	2706.46	43299.6	402446	9.01277		0.0351355	0.0606111
78–79	0.0667132	41946.3	2798.37	40547.2	359146	8.56203		0.0386728	0.0667132
79–80	0.0737407	39148	2886.8	37704.6	318599	8.13832		0.0427466	0.0737407
80–81	0.0628783	36261.2	2280.04	35121.1	280894	7.74642		0.0472006	0.0628783
81–82	0.0700702	33981.1	2381.06	32790.6	245773	7.23264		0.0525993	0.0700702
82–83	0.0780457	31600.1	2466.25	30366.9	212982	6.73994		0.0585863	0.0780457
83–84	0.0867544	29133.8	2527.49	27870.1	182616	6.26817		0.0651236	0.0867544
84–85	0.0977795	26606.3	2601.55	25305.5	154746	5.81612		0.0733997	0.0977795
85–86	0.108752	24004.8	2610.57	22699.5	129440	5.39226		0.0816365	0.108752
86–87	0.119647	21394.2	2559.75	20114.3	106740	4.98923		0.089815	0.119647
87–88	0.134411	18834.4	2531.56	17568.7	86626.2	4.59935		0.100898	0.134411
88–89	0.150641	16302.9	2455.87	15074.9	69057.5	4.23591		0.113081	0.150641
89–90	0.168391	13847	2331.72	12681.1	53982.5	3.8985		0.126406	0.168391
90–91	0.187701	11515.3	2161.44	10434.6	41301.4	3.58666		0.140901	0.187701
91–92	0.208584	9353.85	1951.07	8378.32	30866.8	3.2999		0.156577	0.208584
92–93	0.231024	7402.79	1710.22	6547.68	22488.5	3.03784		0.173422	0.231024
93–94	0.254972	5692.57	1451.44	4966.85	15940.8	2.80029		0.191399	0.254972
94–95	0.280343	4241.12	1188.97	3646.64	10974	2.58752		0.210444	0.280343
95–96	0.307015	3052.15	937.056	2583.63	7327.34	2.40071		0.230465	0.307015
96–97	0.334826	2115.1	708.189	1761	4743.72	2.24279		0.251342	0.334826
97–98	0.36358	1406.91	511.524	1151.15	2982.71	2.12005		0.272927	0.36358
98–99	0.393049	895.384	351.93	719.419	1831.57	2.04557		0.295049	0.393049
99–100	0.422981	543.454	229.871	428.519	1112.15	2.04645		0.317517	0.422981
100 and over	1	313.583	313.583	683.631	683.631	2.18006
				The sum of person-years lived among ages 100–120 (L100-120)	683.631
Age (years)	Mortality between ages x and x + 1	Probability of dying between ages x and x + 1	Number surviving to age x	Number dying between ages x and x + 1	Person-years lived between ages x and x + 1	Total number of person-years lived above age x	Expectation of life at age x
	Mx	qx	lx	dx	Lx	Tx	ex
99	0.37744	0.317518	543.454	229.871	428.519	1112.15	2.04645
100	0.40983	0.340132	313.583	106.66	260.253	683.631	2.18006
101	0.443021	0.362683	206.924	75.0476	169.4	423.377	2.04605
102	0.476729	0.384967	131.876	50.7678	106.492	253.977	1.92588
103	0.51065	0.406787	81.1081	32.9938	64.6113	147.485	1.81838
104	0.544474	0.427966	48.1144	20.5913	37.8187	82.874	1.72244
105	0.577892	0.448344	27.5231	12.3398	21.3532	45.0552	1.637
106	0.610612	0.467792	15.1833	7.10261	11.632	23.7021	1.56106
107	0.642365	0.486204	8.08065	3.92885	6.11623	12.0701	1.4937
108	0.672916	0.503507	4.1518	2.09046	3.10657	5.95387	1.43404
109	0.702067	0.519652	2.06134	1.07118	1.52575	2.8473	1.38128
110	0.729664	0.534618	0.990162	0.529359	0.725482	1.32155	1.33468
111	0.755595	0.548408	0.460803	0.252708	0.334449	0.596066	1.29354
112	0.779789	0.561042	0.208095	0.11675	0.14972	0.261617	1.2572
113	0.802215	0.572558	0.091345	0.0523003	0.0651948	0.111897	1.22499
114	0.822876	0.583005	0.0390447	0.0227633	0.0276631	0.0467018	1.19611
115	0.841804	0.592444	0.0162814	0.00964583	0.0114585	0.0190387	1.16935
116	0.859056	0.600937	0.0066356	0.00398758	0.00464181	0.00758018	1.14235
117	0.874707	0.608554	0.00264802	0.00161146	0.00184229	0.00293836	1.10964
118	0.888844	0.615363	0.00103656	0.00063786	0.000717628	0.00109607	1.05742
119	0.901566	0.621434	0.000398698	0.000247765	0.000274816	0.000378444	0.9492
120	0.912975	0.626833	0.000150934	9.46102e-05	0.000103628	0.000103628	0.686583

## Sheet: 4000-5999
Age interval (between x and x+1)	Probability of dying between ages x and x + 1	Number surviving to age x	Number dying between ages x and x + 1	Person-years lived between ages x and x + 1	Total number of person-years lived above age x	Expectation of life at age x		General population mortality rate for reference group (IRa0)	Age-specific mortality rates for exposure group 1 (IRaj, j=1)
	qx	lx	dx	Lx	Tx	ex		IRa0 = IRa/Pa0	IRaj = IRa0×Hraj
40–41	0.0032207	100000	322.07	99839	3.86808e+06	38.6808		0.00504025	0.0032207
41–42	0.00337046	99677.9	335.961	99509.9	3.76825e+06	37.8042		0.00527462	0.00337046
42–43	0.00356894	99342	354.545	99164.7	3.66874e+06	36.9304		0.00558523	0.00356894
43–44	0.00381903	98987.4	378.036	98798.4	3.56957e+06	36.0609		0.00597661	0.00381903
44–45	0.00410853	98609.4	405.14	98406.8	3.47077e+06	35.1972		0.00642967	0.00410853
45–46	0.00442889	98204.2	434.936	97986.8	3.37237e+06	34.3403		0.00693102	0.00442889
46–47	0.00477742	97769.3	467.085	97535.8	3.27438e+06	33.4909		0.00747645	0.00477742
47–48	0.00515877	97302.2	501.96	97051.2	3.17684e+06	32.6492		0.00807326	0.00515877
48–49	0.00558529	96800.3	540.657	96529.9	3.07979e+06	31.8159		0.00874073	0.00558529
49–50	0.00607074	96259.6	584.367	95967.4	2.98326e+06	30.9918		0.00950044	0.00607074
50–51	0.0063771	95675.2	610.131	95370.2	2.88729e+06	30.1781		0.00997988	0.0063771
51–52	0.00693712	95065.1	659.478	94735.4	2.79192e+06	29.3685		0.0108563	0.00693712
52–53	0.00760214	94405.6	717.685	94046.8	2.69719e+06	28.5702		0.011897	0.00760214
53–54	0.00837245	93688	784.397	93295.8	2.60314e+06	27.7852		0.0131025	0.00837245
54–55	0.0092044	92903.6	855.121	92476	2.50985e+06	27.0156		0.0144045	0.0092044
55–56	0.0100476	92048.4	924.87	91586	2.41737e+06	26.2619		0.0157241	0.0100476
56–57	0.0108887	91123.6	992.213	90627.5	2.32578e+06	25.5234		0.0170403	0.0108887
57–58	0.0117552	90131.3	1059.51	89601.6	2.23516e+06	24.7989		0.0183964	0.0117552
58–59	0.0126704	89071.8	1128.58	88507.5	2.14556e+06	24.0879		0.0198287	0.0126704
59–60	0.0136486	87943.3	1200.3	87343.1	2.05705e+06	23.3906		0.0213594	0.0136486
60–61	0.0128344	86743	1113.3	86186.3	1.9697e+06	22.7074		0.0200853	0.0128344
61–62	0.0138005	85629.7	1181.73	85038.8	1.88352e+06	21.9961		0.0215971	0.0138005
62–63	0.0147831	84447.9	1248.4	83823.7	1.79848e+06	21.2969		0.0231348	0.0147831
63–64	0.0157693	83199.5	1312	82543.5	1.71466e+06	20.609		0.0246782	0.0157693
64–65	0.0167886	81887.5	1374.78	81200.1	1.63211e+06	19.9311		0.0262735	0.0167886
65–66	0.0178822	80512.8	1439.74	79792.9	1.55091e+06	19.2629		0.0279848	0.0178822
66–67	0.0191764	79073	1516.34	78314.8	1.47112e+06	18.6046		0.0300103	0.0191764
67–68	0.0205799	77556.7	1596.11	76758.6	1.3928e+06	17.9585		0.0322066	0.0205799
68–69	0.0221551	75960.6	1682.91	75119.1	1.31605e+06	17.3254		0.0346717	0.0221551
69–70	0.023958	74277.7	1779.54	73387.9	1.24093e+06	16.7066		0.0374932	0.023958
70–71	0.020273	72498.1	1469.75	71763.2	1.16754e+06	16.1044		0.0317263	0.020273
71–72	0.0218595	71028.4	1552.64	70252	1.09578e+06	15.4273		0.0342091	0.0218595
72–73	0.0241553	69475.7	1678.2	68636.6	1.02552e+06	14.7609		0.0378019	0.0241553
73–74	0.0262397	67797.5	1778.99	66908	956887	14.1139		0.041064	0.0262397
74–75	0.0288724	66018.5	1906.11	65065.5	889979	13.4807		0.0451841	0.0288724
75–76	0.031627	64112.4	2027.68	63098.6	824913	12.8667		0.0494949	0.031627
76–77	0.0350377	62084.7	2175.31	60997.1	761815	12.2706		0.0548325	0.0350377
77–78	0.0387302	59909.4	2320.31	58749.3	700818	11.698		0.0606111	0.0387302
78–79	0.0426294	57589.1	2454.99	56361.6	642068	11.1491		0.0667132	0.0426294
79–80	0.04712	55134.1	2597.92	53835.2	585707	10.6233		0.0737407	0.04712
80–81	0.040179	52536.2	2110.85	51480.8	531872	10.1239		0.0628783	0.040179
81–82	0.0447745	50425.4	2257.77	49296.5	480391	9.52677		0.0700702	0.0447745
82–83	0.0498709	48167.6	2402.16	46966.5	431094	8.94989		0.0780457	0.0498709
83–84	0.0554357	45765.4	2537.04	44496.9	384128	8.39341		0.0867544	0.0554357
84–85	0.0624807	43228.4	2700.94	41877.9	339631	7.85667		0.0977795	0.0624807
85–86	0.0694921	40527.4	2816.34	39119.3	297753	7.34695		0.108752	0.0694921
86–87	0.0764539	37711.1	2883.16	36269.5	258634	6.85829		0.119647	0.0764539
87–88	0.0858883	34827.9	2991.31	33332.3	222364	6.38465		0.134411	0.0858883
88–89	0.0962586	31836.6	3064.55	30304.4	189032	5.93756		0.150641	0.0962586
89–90	0.107601	28772.1	3095.91	27224.1	158728	5.51672		0.168391	0.107601
90–91	0.11994	25676.2	3079.61	24136.4	131504	5.12162		0.187701	0.11994
91–92	0.133284	22596.6	3011.77	21090.7	107367	4.75148		0.208584	0.133284
92–93	0.147623	19584.8	2891.17	18139.2	86276.5	4.40528		0.231024	0.147623
93–94	0.162926	16693.6	2719.82	15333.7	68137.3	4.08164		0.254972	0.162926
94–95	0.179138	13973.8	2503.24	12722.2	52803.6	3.77876		0.280343	0.179138
95–96	0.196181	11470.6	2250.31	10345.4	40081.4	3.49428		0.307015	0.196181
96–97	0.213952	9220.25	1972.69	8233.91	29736	3.22507		0.334826	0.213952
97–98	0.232326	7247.56	1683.8	6405.66	21502.1	2.9668		0.36358	0.232326
98–99	0.251157	5563.76	1397.38	4865.07	15096.4	2.71335		0.393049	0.251157
99–100	0.270283	4166.39	1126.1	3603.33	10231.3	2.45569		0.422981	0.270283
100 and over	1	3040.28	3040.28	6628	6628	2.18006
				The sum of person-years lived among ages 100–120 (L100-120)	6628
Age (years)	Mortality between ages x and x + 1	Probability of dying between ages x and x + 1	Number surviving to age x	Number dying between ages x and x + 1	Person-years lived between ages x and x + 1	Total number of person-years lived above age x	Expectation of life at age x
	Mx	qx	lx	dx	Lx	Tx	ex
99	0.37744	0.317518	4166.39	1126.1	3603.33	10231.3	2.45569
100	0.40983	0.340132	3040.28	1034.1	2523.23	6628	2.18006
101	0.443021	0.362683	2006.19	727.609	1642.38	4104.77	2.04605
102	0.476729	0.384967	1278.58	492.209	1032.47	2462.39	1.92588
103	0.51065	0.406787	786.368	319.884	626.426	1429.91	1.81838
104	0.544474	0.427966	466.483	199.639	366.664	803.488	1.72244
105	0.577892	0.448344	266.845	119.638	207.025	436.824	1.637
106	0.610612	0.467792	147.206	68.8619	112.775	229.799	1.56106
107	0.642365	0.486204	78.3443	38.0914	59.2987	117.023	1.4937
108	0.672916	0.503507	40.253	20.2676	30.1192	57.7246	1.43404
109	0.702067	0.519652	19.9853	10.3854	14.7926	27.6054	1.38128
110	0.729664	0.534618	9.59991	5.13229	7.03377	12.8128	1.33468
111	0.755595	0.548408	4.46762	2.45008	3.24258	5.77904	1.29354
112	0.779789	0.561042	2.01754	1.13193	1.45158	2.53645	1.2572
113	0.802215	0.572558	0.885617	0.507067	0.632084	1.08487	1.22499
114	0.822876	0.583005	0.37855	0.220697	0.268202	0.452787	1.19611
115	0.841804	0.592444	0.157853	0.0935192	0.111094	0.184586	1.16935
116	0.859056	0.600937	0.0643341	0.0386608	0.0450038	0.0734921	1.14235
117	0.874707	0.608554	0.0256734	0.0156236	0.0178616	0.0284883	1.10964
118	0.888844	0.615363	0.0100497	0.00618424	0.00695762	0.0106268	1.05742
119	0.901566	0.621434	0.0038655	0.00240215	0.00266442	0.00366913	0.9492
120	0.912975	0.626833	0.00146335	0.000917274	0.00100471	0.00100471	0.686583

## Sheet: 6000-7999
Age interval (between x and x+1)	Probability of dying between ages x and x + 1	Number surviving to age x	Number dying between ages x and x + 1	Person-years lived between ages x and x + 1	Total number of person-years lived above age x	Expectation of life at age x		General population mortality rate for reference group (IRa0)	Age-specific mortality rates for exposure group 2 (IRaj, j=2)
	qx	lx	dx	Lx	Tx	ex		IRa0 = IRa/Pa0	IRaj = IRa0×Hraj
40–41	0.0023711	100000	237.11	99881.4	4.23152e+06	42.3152		0.00504025	0.0023711
41–42	0.00248136	99762.9	247.547	99639.1	4.13163e+06	41.4145		0.00527462	0.00248136
42–43	0.00262748	99515.3	261.474	99384.6	4.032e+06	40.5163		0.00558523	0.00262748
43–44	0.00281159	99253.9	279.062	99114.3	3.93261e+06	39.6217		0.00597661	0.00281159
44–45	0.00302473	98974.8	299.372	98825.1	3.8335e+06	38.732		0.00642967	0.00302473
45–46	0.00326058	98675.4	321.739	98514.6	3.73467e+06	37.848		0.00693102	0.00326058
46–47	0.00351717	98353.7	345.926	98180.7	3.63616e+06	36.9702		0.00747645	0.00351717
47–48	0.00379793	98007.8	372.226	97821.7	3.53798e+06	36.0989		0.00807326	0.00379793
48–49	0.00411193	97635.5	401.47	97434.8	3.44015e+06	35.2347		0.00874073	0.00411193
49–50	0.00446932	97234.1	434.57	97016.8	3.34272e+06	34.3781		0.00950044	0.00446932
50–51	0.00469487	96799.5	454.461	96572.3	3.2457e+06	33.5302		0.00997988	0.00469487
51–52	0.00510716	96345	492.049	96099	3.14913e+06	32.686		0.0108563	0.00510716
52–53	0.00559675	95853	536.465	95584.8	3.05303e+06	31.8512		0.011897	0.00559675
53–54	0.00616385	95316.5	587.517	95022.8	2.95745e+06	31.0276		0.0131025	0.00616385
54–55	0.00677634	94729	641.916	94408.1	2.86242e+06	30.217		0.0144045	0.00677634
55–56	0.00739715	94087.1	695.976	93739.1	2.76802e+06	29.4197		0.0157241	0.00739715
56–57	0.0080163	93391.1	748.651	93016.8	2.67428e+06	28.6352		0.0170403	0.0080163
57–58	0.00865428	92642.5	801.754	92241.6	2.58126e+06	27.8626		0.0183964	0.00865428
58–59	0.00932806	91840.7	856.696	91412.4	2.48902e+06	27.1015		0.0198287	0.00932806
59–60	0.0100482	90984	914.223	90526.9	2.39761e+06	26.352		0.0213594	0.0100482
60–61	0.00944879	90069.8	851.05	89644.3	2.30708e+06	25.6144		0.0200853	0.00944879
61–62	0.01016	89218.7	906.462	88765.5	2.21744e+06	24.8539		0.0215971	0.01016
62–63	0.0108834	88312.3	961.137	87831.7	2.12867e+06	24.1039		0.0231348	0.0108834
63–64	0.0116095	87351.1	1014.1	86844.1	2.04084e+06	23.3636		0.0246782	0.0116095
64–65	0.0123599	86337	1067.12	85803.5	1.95399e+06	22.6322		0.0262735	0.0123599
65–66	0.013165	85269.9	1122.58	84708.6	1.86819e+06	21.9091		0.0279848	0.013165
66–67	0.0141178	84147.3	1187.98	83553.4	1.78348e+06	21.1947		0.0300103	0.0141178
67–68	0.015151	82959.4	1256.92	82330.9	1.69993e+06	20.4911		0.0322066	0.015151
68–69	0.0163107	81702.5	1332.63	81036.1	1.6176e+06	19.7986		0.0346717	0.0163107
69–70	0.017638	80369.8	1417.57	79661	1.53656e+06	19.1186		0.0374932	0.017638
70–71	0.0149251	78952.3	1178.37	78363.1	1.4569e+06	18.4529		0.0317263	0.0149251
71–72	0.0160931	77773.9	1251.62	77148.1	1.37854e+06	17.7249		0.0342091	0.0160931
72–73	0.0177833	76522.3	1360.82	75841.9	1.30139e+06	17.0067		0.0378019	0.0177833
73–74	0.0193178	75161.4	1451.96	74435.5	1.22555e+06	16.3055		0.041064	0.0193178
74–75	0.0212561	73709.5	1566.77	72926.1	1.15111e+06	15.6169		0.0451841	0.0212561
75–76	0.023284	72142.7	1679.77	71302.8	1.07819e+06	14.9452		0.0494949	0.023284
76–77	0.025795	70462.9	1817.59	69554.1	1.00688e+06	14.2895		0.0548325	0.025795
77–78	0.0285135	68645.4	1957.32	67666.7	937329	13.6547		0.0606111	0.0285135
78–79	0.0313841	66688	2092.94	65641.6	869662	13.0408		0.0667132	0.0313841
79–80	0.0346901	64595.1	2240.81	63474.7	804021	12.4471		0.0737407	0.0346901
80–81	0.02958	62354.3	1844.44	61432.1	740546	11.8764		0.0628783	0.02958
81–82	0.0329633	60509.8	1994.61	59512.5	679114	11.2232		0.0700702	0.0329633
82–83	0.0367153	58515.2	2148.4	57441	619601	10.5887		0.0780457	0.0367153
83–84	0.0408122	56366.8	2300.45	55216.6	562160	9.97325		0.0867544	0.0408122
84–85	0.0459987	54066.4	2486.98	52822.9	506944	9.37632		0.0977795	0.0459987
85–86	0.0511606	51579.4	2638.83	50260	454121	8.80431		0.108752	0.0511606
86–87	0.0562859	48940.6	2754.66	47563.2	403861	8.25207		0.119647	0.0562859
87–88	0.0632316	46185.9	2920.41	44725.7	356298	7.71442		0.134411	0.0632316
88–89	0.0708663	43265.5	3066.06	41732.5	311572	7.20139		0.150641	0.0708663
89–90	0.0792168	40199.4	3184.47	38607.2	269839	6.71252		0.168391	0.0792168
90–91	0.088301	37015	3268.46	35380.7	231232	6.24699		0.187701	0.088301
91–92	0.0981249	33746.5	3311.37	32090.8	195851	5.80361		0.208584	0.0981249
92–93	0.108681	30435.1	3307.73	28781.3	163761	5.38065		0.231024	0.108681
93–94	0.119947	27127.4	3253.85	25500.5	134979	4.97576		0.254972	0.119947
94–95	0.131883	23873.5	3148.51	22299.3	109479	4.58578		0.280343	0.131883
95–96	0.14443	20725	2993.31	19228.4	87179.6	4.20649		0.307015	0.14443
96–97	0.157513	17731.7	2792.98	16335.2	67951.3	3.83219		0.334826	0.157513
97–98	0.17104	14938.7	2555.12	13661.2	51616	3.45518		0.36358	0.17104
98–99	0.184903	12383.6	2289.77	11238.7	37954.8	3.06492		0.393049	0.184903
99–100	0.198984	10093.8	2008.52	9089.59	26716.1	2.64677		0.422981	0.198984
100 and over	1	8085.33	8085.33	17626.5	17626.5	2.18006
				The sum of person-years lived among ages 100–120 (L100-120)	17626.5
Age (years)	Mortality between ages x and x + 1	Probability of dying between ages x and x + 1	Number surviving to age x	Number dying between ages x and x + 1	Person-years lived between ages x and x + 1	Total number of person-years lived above age x	Expectation of life at age x
	Mx	qx	lx	dx	Lx	Tx	ex
99	0.37744	0.317518	10093.8	2008.52	9089.59	26716.1	2.64677
100	0.40983	0.340132	8085.33	2750.08	6710.29	17626.5	2.18006
101	0.443021	0.362683	5335.25	1935	4367.75	10916.2	2.04605
102	0.476729	0.384967	3400.25	1308.98	2745.76	6548.47	1.92588
103	0.51065	0.406787	2091.27	850.701	1665.92	3802.71	1.81838
104	0.544474	0.427966	1240.57	530.92	975.106	2136.8	1.72244
105	0.577892	0.448344	709.647	318.166	550.564	1161.69	1.637
106	0.610612	0.467792	391.48	183.131	299.915	611.126	1.56106
107	0.642365	0.486204	208.349	101.3	157.699	311.212	1.4937
108	0.672916	0.503507	107.049	53.8998	80.0989	153.513	1.43404
109	0.702067	0.519652	53.149	27.619	39.3395	73.4139	1.38128
110	0.729664	0.534618	25.53	13.6488	18.7056	34.0744	1.33468
111	0.755595	0.548408	11.8812	6.51574	8.62333	15.3688	1.29354
112	0.779789	0.561042	5.36546	3.01025	3.86033	6.74544	1.2572
113	0.802215	0.572558	2.35521	1.34849	1.68096	2.88511	1.22499
114	0.822876	0.583005	1.00672	0.586921	0.713256	1.20414	1.19611
115	0.841804	0.592444	0.419795	0.248705	0.295443	0.490888	1.16935
116	0.859056	0.600937	0.17109	0.102814	0.119683	0.195445	1.14235
117	0.874707	0.608554	0.0682758	0.0415495	0.047501	0.0757618	1.10964
118	0.888844	0.615363	0.0267263	0.0164464	0.0185031	0.0282608	1.05742
119	0.901566	0.621434	0.0102799	0.00638829	0.00708577	0.00975769	0.9492
120	0.912975	0.626833	0.00389162	0.0024394	0.00267192	0.00267192	0.686583

## Sheet: 8000-9999
Age interval (between x and x+1)	Probability of dying between ages x and x + 1	Number surviving to age x	Number dying between ages x and x + 1	Person-years lived between ages x and x + 1	Total number of person-years lived above age x	Expectation of life at age x		General population mortality rate for reference group (IRa0)	Age-specific mortality rates for exposure group 3 (IRaj, j=3)
	qx	lx	dx	Lx	Tx	ex		IRa0 = IRa/Pa0	IRaj = IRa0×Hraj
40–41	0.00184081	100000	184.081	99908	4.51814e+06	45.1814		0.00504025	0.00184081
41–42	0.00192641	99815.9	192.286	99719.8	4.41823e+06	44.2638		0.00527462	0.00192641
42–43	0.00203985	99623.6	203.217	99522	4.31851e+06	43.3482		0.00558523	0.00203985
43–44	0.00218279	99420.4	217.014	99311.9	4.21899e+06	42.4358		0.00597661	0.00218279
44–45	0.00234826	99203.4	232.955	99086.9	4.11967e+06	41.5275		0.00642967	0.00234826
45–46	0.00253136	98970.4	250.53	98845.2	4.02059e+06	40.6241		0.00693102	0.00253136
46–47	0.00273056	98719.9	269.561	98585.1	3.92174e+06	39.7259		0.00747645	0.00273056
47–48	0.00294853	98450.4	290.284	98305.2	3.82316e+06	38.8333		0.00807326	0.00294853
48–49	0.0031923	98160.1	313.357	98003.4	3.72485e+06	37.9467		0.00874073	0.0031923
49–50	0.00346977	97846.7	339.505	97677	3.62685e+06	37.0666		0.00950044	0.00346977
50–51	0.00364487	97507.2	355.401	97329.5	3.52917e+06	36.1939		0.00997988	0.00364487
51–52	0.00396496	97151.8	385.203	96959.2	3.43184e+06	35.3245		0.0108563	0.00396496
52–53	0.00434505	96766.6	420.456	96556.4	3.33488e+06	34.4632		0.011897	0.00434505
53–54	0.00478532	96346.2	461.048	96115.6	3.23833e+06	33.6114		0.0131025	0.00478532
54–55	0.00526083	95885.1	504.435	95632.9	3.14221e+06	32.7706		0.0144045	0.00526083
55–56	0.00574279	95380.7	547.752	95106.8	3.04658e+06	31.9412		0.0157241	0.00574279
56–57	0.00622348	94832.9	590.191	94537.8	2.95147e+06	31.1229		0.0170403	0.00622348
57–58	0.00671877	94242.7	633.196	93926.1	2.85693e+06	30.3146		0.0183964	0.00671877
58–59	0.00724186	93609.5	677.907	93270.6	2.76301e+06	29.5163		0.0198287	0.00724186
59–60	0.00780093	92931.6	724.953	92569.1	2.66974e+06	28.728		0.0213594	0.00780093
60–61	0.00733559	92206.7	676.39	91868.5	2.57717e+06	27.9499		0.0200853	0.00733559
61–62	0.00788774	91530.3	721.967	91169.3	2.4853e+06	27.1527		0.0215971	0.00788774
62–63	0.00844935	90808.3	767.271	90424.7	2.39413e+06	26.3646		0.0231348	0.00844935
63–64	0.00901303	90041	811.543	89635.3	2.3037e+06	25.585		0.0246782	0.00901303
64–65	0.00959566	89229.5	856.216	88801.4	2.21407e+06	24.8132		0.0262735	0.00959566
65–66	0.0102207	88373.3	903.234	87921.7	2.12527e+06	24.0488		0.0279848	0.0102207
66–67	0.0109604	87470	958.707	86990.7	2.03735e+06	23.2919		0.0300103	0.0109604
67–68	0.0117625	86511.3	1017.59	86002.5	1.95036e+06	22.5445		0.0322066	0.0117625
68–69	0.0126629	85493.7	1082.6	84952.4	1.86435e+06	21.8069		0.0346717	0.0126629
69–70	0.0136933	84411.2	1155.87	83833.2	1.7794e+06	21.0802		0.0374932	0.0136933
70–71	0.0115872	83255.3	964.692	82772.9	1.69557e+06	20.3659		0.0317263	0.0115872
71–72	0.0124939	82290.6	1028.13	81776.5	1.61279e+06	19.5988		0.0342091	0.0124939
72–73	0.0138061	81262.5	1121.92	80701.5	1.53102e+06	18.8404		0.0378019	0.0138061
73–74	0.0149975	80140.5	1201.9	79539.6	1.45032e+06	18.0972		0.041064	0.0149975
74–75	0.0165022	78938.6	1302.66	78287.3	1.37078e+06	17.3651		0.0451841	0.0165022
75–76	0.0180766	77636	1403.4	76934.3	1.29249e+06	16.6481		0.0494949	0.0180766
76–77	0.020026	76232.6	1526.64	75469.3	1.21556e+06	15.9454		0.0548325	0.020026
77–78	0.0221365	74705.9	1653.73	73879.1	1.14009e+06	15.261		0.0606111	0.0221365
78–79	0.0243651	73052.2	1779.93	72162.2	1.06621e+06	14.5951		0.0667132	0.0243651
79–80	0.0269317	71272.3	1919.49	70312.5	994045	13.9471		0.0737407	0.0269317
80–81	0.0229645	69352.8	1592.66	68556.5	923732	13.3193		0.0628783	0.0229645
81–82	0.0255912	67760.1	1734.06	66893.1	855176	12.6206		0.0700702	0.0255912
82–83	0.028504	66026.1	1882.01	65085.1	788282	11.939		0.0780457	0.028504
83–84	0.0316846	64144.1	2032.38	63127.9	723197	11.2746		0.0867544	0.0316846
84–85	0.0357112	62111.7	2218.08	61002.7	660069	10.6271		0.0977795	0.0357112
85–86	0.0397187	59893.6	2378.89	58704.2	599067	10.0022		0.108752	0.0397187
86–87	0.0436977	57514.7	2513.26	56258.1	540363	9.39521		0.119647	0.0436977
87–88	0.04909	55001.5	2700.02	53651.4	484105	8.80167		0.134411	0.04909
88–89	0.0550172	52301.4	2877.48	50862.7	430453	8.23024		0.150641	0.0550172
89–90	0.0615002	49424	3039.58	47904.2	379590	7.68029		0.168391	0.0615002
90–91	0.0685527	46384.4	3179.77	44794.5	331686	7.15082		0.187701	0.0685527
91–92	0.0761795	43204.6	3291.31	41558.9	286892	6.64031		0.208584	0.0761795
92–93	0.084375	39913.3	3367.68	38229.5	245333	6.14664		0.231024	0.084375
93–94	0.0931213	36545.6	3403.17	34844	207103	5.66698		0.254972	0.0931213
94–95	0.102387	33142.4	3393.37	31445.8	172259	5.19755		0.280343	0.102387
95–96	0.112129	29749.1	3335.72	28081.2	140814	4.73338		0.307015	0.112129
96–97	0.122286	26413.3	3229.98	24798.4	112732	4.26801		0.334826	0.122286
97–98	0.132787	23183.4	3078.46	21644.1	87934	3.79298		0.36358	0.132787
98–99	0.14355	20104.9	2886.07	18661.9	66289.9	3.2972		0.393049	0.14355
99–100	0.154482	17218.8	2660	15888.8	47628	2.76604		0.422981	0.154482
100 and over	1	14558.8	14558.8	31739.2	31739.2	2.18006
				The sum of person-years lived among ages 100–120 (L100-120)	31739.2
Age (years)	Mortality between ages x and x + 1	Probability of dying between ages x and x + 1	Number surviving to age x	Number dying between ages x and x + 1	Person-years lived between ages x and x + 1	Total number of person-years lived above age x	Expectation of life at age x
	Mx	qx	lx	dx	Lx	Tx	ex
99	0.37744	0.317518	17218.8	2660	15888.8	47628	2.76604
100	0.40983	0.340132	14558.8	4951.92	12082.9	31739.2	2.18006
101	0.443021	0.362683	9606.92	3484.27	7864.79	19656.3	2.04605
102	0.476729	0.384967	6122.66	2357.02	4944.15	11791.5	1.92588
103	0.51065	0.406787	3765.64	1531.81	2999.73	6847.35	1.81838
104	0.544474	0.427966	2233.83	956	1755.82	3847.62	1.72244
105	0.577892	0.448344	1277.82	572.906	991.372	2091.8	1.637
106	0.610612	0.467792	704.919	329.756	540.041	1100.42	1.56106
107	0.642365	0.486204	375.164	182.406	283.96	560.383	1.4937
108	0.672916	0.503507	192.757	97.0546	144.23	276.423	1.43404
109	0.702067	0.519652	95.7027	49.7321	70.8367	132.193	1.38128
110	0.729664	0.534618	45.9706	24.5767	33.6822	61.356	1.33468
111	0.755595	0.548408	21.3939	11.7326	15.5276	27.6738	1.29354
112	0.779789	0.561042	9.66131	5.4204	6.95111	12.1462	1.2572
113	0.802215	0.572558	4.24091	2.42817	3.02683	5.19507	1.22499
114	0.822876	0.583005	1.81274	1.05684	1.28432	2.16824	1.19611
115	0.841804	0.592444	0.755904	0.44783	0.531989	0.883916	1.16935
116	0.859056	0.600937	0.308074	0.185133	0.215507	0.351928	1.14235
117	0.874707	0.608554	0.122941	0.0748161	0.0855327	0.136421	1.10964
118	0.888844	0.615363	0.0481247	0.0296142	0.0333176	0.0508878	1.05742
119	0.901566	0.621434	0.0185105	0.0115031	0.012759	0.0175702	0.9492
120	0.912975	0.626833	0.00700745	0.0043925	0.0048112	0.0048112	0.686583

## Sheet: 10000-11999
Age interval (between x and x+1)	Probability of dying between ages x and x + 1	Number surviving to age x	Number dying between ages x and x + 1	Person-years lived between ages x and x + 1	Total number of person-years lived above age x	Expectation of life at age x		General population mortality rate for reference group (IRa0)	Age-specific mortality rates for exposure group 4 (IRaj, j=4)
	qx	lx	dx	Lx	Tx	ex		IRa0 = IRa/Pa0	IRaj = IRa0×Hraj
40–41	0.00156887	100000	156.887	99921.6	4.68934e+06	46.8934		0.00504025	0.00156887
41–42	0.00164183	99843.1	163.925	99761.2	4.58942e+06	45.9663		0.00527462	0.00164183
42–43	0.00173851	99679.2	173.293	99592.5	4.48966e+06	45.0411		0.00558523	0.00173851
43–44	0.00186033	99505.9	185.114	99413.3	4.39007e+06	44.1186		0.00597661	0.00186033
44–45	0.00200136	99320.8	198.776	99221.4	4.29065e+06	43.1999		0.00642967	0.00200136
45–46	0.00215741	99122	213.847	99015.1	4.19143e+06	42.2856		0.00693102	0.00215741
46–47	0.00232718	98908.2	230.178	98793.1	4.09242e+06	41.3759		0.00747645	0.00232718
47–48	0.00251295	98678	247.973	98554	3.99362e+06	40.4713		0.00807326	0.00251295
48–49	0.00272071	98430	267.8	98296.1	3.89507e+06	39.572		0.00874073	0.00272071
49–50	0.00295719	98162.2	290.284	98017.1	3.79677e+06	38.6786		0.00950044	0.00295719
50–51	0.00310642	97871.9	304.032	97719.9	3.69876e+06	37.7918		0.00997988	0.00310642
51–52	0.00337922	97567.9	329.704	97403	3.60104e+06	36.908		0.0108563	0.00337922
52–53	0.00370317	97238.2	360.089	97058.1	3.50363e+06	36.0314		0.011897	0.00370317
53–54	0.0040784	96878.1	395.108	96680.5	3.40657e+06	35.1635		0.0131025	0.0040784
54–55	0.00448366	96483	432.597	96266.7	3.30989e+06	34.3055		0.0144045	0.00448366
55–56	0.00489443	96050.4	470.112	95815.3	3.21363e+06	33.4577		0.0157241	0.00489443
56–57	0.0053041	95580.3	506.967	95326.8	3.11781e+06	32.6198		0.0170403	0.0053041
57–58	0.00572623	95073.3	544.411	94801.1	3.02248e+06	31.7911		0.0183964	0.00572623
58–59	0.00617204	94528.9	583.437	94237.2	2.92768e+06	30.9713		0.0198287	0.00617204
59–60	0.00664852	93945.5	624.598	93633.2	2.83345e+06	30.1605		0.0213594	0.00664852
60–61	0.00625193	93320.9	583.435	93029.2	2.73981e+06	29.3591		0.0200853	0.00625193
61–62	0.00672251	92737.4	623.428	92425.7	2.64678e+06	28.5406		0.0215971	0.00672251
62–63	0.00720115	92114	663.327	91782.3	2.55436e+06	27.7304		0.0231348	0.00720115
63–64	0.00768156	91450.7	702.484	91099.4	2.46258e+06	26.9279		0.0246782	0.00768156
64–65	0.00817812	90748.2	742.149	90377.1	2.37148e+06	26.1325		0.0262735	0.00817812
65–66	0.0087108	90006	784.024	89614	2.2811e+06	25.3438		0.0279848	0.0087108
66–67	0.00934126	89222	833.446	88805.3	2.19149e+06	24.5622		0.0300103	0.00934126
67–68	0.0100249	88388.6	886.087	87945.5	2.10268e+06	23.7891		0.0322066	0.0100249
68–69	0.0107922	87502.5	944.346	87030.3	2.01473e+06	23.0249		0.0346717	0.0107922
69–70	0.0116705	86558.1	1010.17	86053.1	1.9277e+06	22.2706		0.0374932	0.0116705
70–71	0.00987542	85548	844.822	85125.6	1.84165e+06	21.5277		0.0317263	0.00987542
71–72	0.0106482	84703.1	901.939	84252.2	1.75653e+06	20.7374		0.0342091	0.0106482
72–73	0.0117666	83801.2	986.052	83308.2	1.67227e+06	19.9552		0.0378019	0.0117666
73–74	0.0127819	82815.2	1058.54	82285.9	1.58897e+06	19.1869		0.041064	0.0127819
74–75	0.0140644	81756.6	1149.86	81181.7	1.50668e+06	18.4288		0.0451841	0.0140644
75–76	0.0154062	80606.8	1241.85	79985.8	1.4255e+06	17.6846		0.0494949	0.0154062
76–77	0.0170676	79364.9	1354.57	78687.6	1.34551e+06	16.9535		0.0548325	0.0170676
77–78	0.0188663	78010.3	1471.77	77274.5	1.26682e+06	16.2392		0.0606111	0.0188663
78–79	0.0207657	76538.6	1589.38	75743.9	1.18955e+06	15.5418		0.0667132	0.0207657
79–80	0.0229532	74949.2	1720.32	74089	1.11381e+06	14.8608		0.0737407	0.0229532
80–81	0.0195721	73228.9	1433.24	72512.3	1.03972e+06	14.1982		0.0628783	0.0195721
81–82	0.0218107	71795.6	1565.91	71012.7	967205	13.4716		0.0700702	0.0218107
82–83	0.0242932	70229.7	1706.1	69376.7	896192	12.7609		0.0780457	0.0242932
83–84	0.0270039	68523.6	1850.41	67598.4	826815	12.0661		0.0867544	0.0270039
84–85	0.0304357	66673.2	2029.25	65658.6	759217	11.3871		0.0977795	0.0304357
85–86	0.0338511	64644	2188.27	63549.8	693558	10.7289		0.108752	0.0338511
86–87	0.0372424	62455.7	2326	61292.7	630009	10.0873		0.119647	0.0372424
87–88	0.0418381	60129.7	2515.71	58871.8	568716	9.45815		0.134411	0.0418381
88–89	0.0468897	57614	2701.5	56263.2	509844	8.84931		0.150641	0.0468897
89–90	0.052415	54912.5	2878.24	53473.4	453581	8.26007		0.168391	0.052415
90–91	0.0584256	52034.2	3040.13	50514.2	400107	7.68931		0.187701	0.0584256
91–92	0.0649257	48994.1	3180.98	47403.6	349593	7.13541		0.208584	0.0649257
92–93	0.0719105	45813.1	3294.45	44165.9	302190	6.59613		0.231024	0.0719105
93–94	0.0793648	42518.7	3374.49	40831.5	258024	6.06848		0.254972	0.0793648
94–95	0.087262	39144.2	3415.8	37436.3	217192	5.54852		0.280343	0.087262
95–96	0.0955641	35728.4	3414.35	34021.2	179756	5.03118		0.307015	0.0955641
96–97	0.104221	32314.1	3367.8	30630.2	145735	4.50995		0.334826	0.104221
97–98	0.113171	28946.3	3275.88	27308.3	115105	3.97649		0.36358	0.113171
98–99	0.122344	25670.4	3140.62	24100.1	87796.3	3.42014		0.393049	0.122344
99–100	0.131661	22529.8	2966.29	21046.6	63696.2	2.8272		0.422981	0.131661
100 and over	1	19563.5	19563.5	42649.6	42649.6	2.18006
				The sum of person-years lived among ages 100–120 (L100-120)	42649.6
Age (years)	Mortality between ages x and x + 1	Probability of dying between ages x and x + 1	Number surviving to age x	Number dying between ages x and x + 1	Person-years lived between ages x and x + 1	Total number of person-years lived above age x	Expectation of life at age x
	Mx	qx	lx	dx	Lx	Tx	ex
99	0.37744	0.317518	22529.8	2966.29	21046.6	63696.2	2.8272
100	0.40983	0.340132	19563.5	6654.15	16236.4	42649.6	2.18006
101	0.443021	0.362683	12909.3	4681.99	10568.3	26413.2	2.04605
102	0.476729	0.384967	8227.33	3167.25	6643.71	15844.9	1.92588
103	0.51065	0.406787	5060.08	2058.38	4030.9	9201.14	1.81838
104	0.544474	0.427966	3001.71	1284.63	2359.39	5170.25	1.72244
105	0.577892	0.448344	1717.08	769.843	1332.16	2810.86	1.637
106	0.610612	0.467792	947.236	443.11	725.681	1478.7	1.56106
107	0.642365	0.486204	504.127	245.109	381.572	753.016	1.4937
108	0.672916	0.503507	259.018	130.417	193.809	371.443	1.43404
109	0.702067	0.519652	128.601	66.8276	95.1869	177.634	1.38128
110	0.729664	0.534618	61.7731	33.025	45.2606	82.4472	1.33468
111	0.755595	0.548408	28.7481	15.7657	20.8652	37.1867	1.29354
112	0.779789	0.561042	12.9824	7.28367	9.34056	16.3214	1.2572
113	0.802215	0.572558	5.69873	3.26285	4.0673	6.98088	1.22499
114	0.822876	0.583005	2.43588	1.42013	1.72581	2.91358	1.19611
115	0.841804	0.592444	1.01575	0.601773	0.714861	1.18776	1.16935
116	0.859056	0.600937	0.413974	0.248772	0.289588	0.472903	1.14235
117	0.874707	0.608554	0.165202	0.100534	0.114935	0.183315	1.10964
118	0.888844	0.615363	0.0646676	0.0397941	0.0447706	0.0683806	1.05742
119	0.901566	0.621434	0.0248735	0.0154573	0.0171449	0.02361	0.9492
120	0.912975	0.626833	0.00941627	0.00590243	0.00646506	0.00646506	0.686583

## Sheet: >=12000
Age interval (between x and x+1)	Probability of dying between ages x and x + 1	Number surviving to age x	Number dying between ages x and x + 1	Person-years lived between ages x and x + 1	Total number of person-years lived above age x	Expectation of life at age x		General population mortality rate for reference group (IRa0)	Age-specific mortality rates for exposure group 5 (IRaj, j=5)
	qx	lx	dx	Lx	Tx	ex		IRa0 = IRa/Pa0	IRaj = IRa0×Hraj
40–41	0.00139253	100000	139.253	99930.4	4.81101e+06	48.1101		0.00504025	0.00139253
41–42	0.00145728	99860.7	145.525	99788	4.71108e+06	47.1765		0.00527462	0.00145728
42–43	0.0015431	99715.2	153.87	99638.3	4.61129e+06	46.2446		0.00558523	0.0015431
43–44	0.00165123	99561.4	164.398	99479.2	4.51165e+06	45.3153		0.00597661	0.00165123
44–45	0.0017764	99397	176.569	99308.7	4.41217e+06	44.3894		0.00642967	0.0017764
45–46	0.00191491	99220.4	189.998	99125.4	4.31287e+06	43.4675		0.00693102	0.00191491
46–47	0.0020656	99030.4	204.558	98928.1	4.21374e+06	42.55		0.00747645	0.0020656
47–48	0.00223049	98825.8	220.43	98715.6	4.11481e+06	41.637		0.00807326	0.00223049
48–49	0.0024149	98605.4	238.122	98486.3	4.0161e+06	40.729		0.00874073	0.0024149
49–50	0.0026248	98367.3	258.194	98238.2	3.91761e+06	39.8264		0.00950044	0.0026248
50–51	0.00275726	98109.1	270.512	97973.8	3.81937e+06	38.9299		0.00997988	0.00275726
51–52	0.00299939	97838.6	293.456	97691.8	3.7214e+06	38.0361		0.0108563	0.00299939
52–53	0.00328692	97545.1	320.623	97384.8	3.62371e+06	37.149		0.011897	0.00328692
53–54	0.00361998	97224.5	351.951	97048.5	3.52632e+06	36.2699		0.0131025	0.00361998
54–55	0.00397969	96872.5	385.523	96679.8	3.42927e+06	35.3999		0.0144045	0.00397969
55–56	0.00434428	96487	419.167	96277.4	3.33259e+06	34.5393		0.0157241	0.00434428
56–57	0.00470791	96067.8	452.279	95841.7	3.23632e+06	33.6878		0.0170403	0.00470791
57–58	0.00508259	95615.6	485.975	95372.6	3.14047e+06	32.8448		0.0183964	0.00508259
58–59	0.00547829	95129.6	521.148	94869	3.0451e+06	32.01		0.0198287	0.00547829
59–60	0.00590121	94608.4	558.304	94329.3	2.95023e+06	31.1836		0.0213594	0.00590121
60–61	0.0055492	94050.1	521.903	93789.2	2.8559e+06	30.3658		0.0200853	0.0055492
61–62	0.00596689	93528.2	558.072	93249.2	2.76211e+06	29.5324		0.0215971	0.00596689
62–63	0.00639173	92970.2	594.24	92673	2.66887e+06	28.7067		0.0231348	0.00639173
63–64	0.00681814	92375.9	629.832	92061	2.57619e+06	27.8881		0.0246782	0.00681814
64–65	0.00725888	91746.1	665.974	91413.1	2.48413e+06	27.0762		0.0262735	0.00725888
65–66	0.00773168	91080.1	704.203	90728	2.39272e+06	26.2705		0.0279848	0.00773168
66–67	0.00829128	90375.9	749.332	90001.3	2.30199e+06	25.4713		0.0300103	0.00829128
67–68	0.00889808	89626.6	797.505	89227.8	2.21199e+06	24.6801		0.0322066	0.00889808
68–69	0.00957915	88829.1	850.907	88403.6	2.12276e+06	23.8971		0.0346717	0.00957915
69–70	0.0103587	87978.2	911.337	87522.5	2.03436e+06	23.1234		0.0374932	0.0103587
70–71	0.0087654	87066.8	763.176	86685.3	1.94683e+06	22.3602		0.0317263	0.0087654
71–72	0.00945135	86303.7	815.686	85895.8	1.86015e+06	21.5535		0.0342091	0.00945135
72–73	0.010444	85488	892.834	85041.6	1.77425e+06	20.7544		0.0378019	0.010444
73–74	0.0113452	84595.1	959.75	84115.3	1.68921e+06	19.9682		0.041064	0.0113452
74–75	0.0124835	83635.4	1044.06	83113.4	1.6051e+06	19.1916		0.0451841	0.0124835
75–76	0.0136745	82591.3	1129.4	82026.6	1.52198e+06	18.4279		0.0494949	0.0136745
76–77	0.0151492	81461.9	1234.08	80844.9	1.43996e+06	17.6764		0.0548325	0.0151492
77–78	0.0167457	80227.8	1343.47	79556.1	1.35911e+06	16.9407		0.0606111	0.0167457
78–79	0.0184316	78884.4	1453.97	78157.4	1.27956e+06	16.2207		0.0667132	0.0184316
79–80	0.0203732	77430.4	1577.51	76641.7	1.2014e+06	15.5158		0.0737407	0.0203732
80–81	0.0173721	75852.9	1317.73	75194	1.12476e+06	14.8281		0.0628783	0.0173721
81–82	0.0193591	74535.2	1442.93	73813.7	1.04956e+06	14.0814		0.0700702	0.0193591
82–83	0.0215626	73092.2	1576.06	72304.2	975749	13.3496		0.0780457	0.0215626
83–84	0.0239686	71516.2	1714.15	70659.1	903445	12.6327		0.0867544	0.0239686
84–85	0.0270147	69802	1885.68	68859.2	832786	11.9307		0.0977795	0.0270147
85–86	0.0300462	67916.4	2040.63	66896	763927	11.248		0.108752	0.0300462
86–87	0.0330563	65875.7	2177.61	64786.9	697030	10.581		0.119647	0.0330563
87–88	0.0371354	63698.1	2365.45	62515.4	632244	9.92562		0.134411	0.0371354
88–89	0.0416192	61332.7	2552.62	60056.4	569728	9.28915		0.150641	0.0416192
89–90	0.0465234	58780.1	2734.65	57412.7	509672	8.67083		0.168391	0.0465234
90–91	0.0518584	56045.4	2906.43	54592.2	452259	8.06951		0.187701	0.0518584
91–92	0.0576279	53139	3062.29	51607.8	397667	7.48353		0.208584	0.0576279
92–93	0.0638276	50076.7	3196.28	48478.5	346059	6.91058		0.231024	0.0638276
93–94	0.070444	46880.4	3302.44	45229.2	297580	6.34765		0.254972	0.070444
94–95	0.0774536	43578	3375.27	41890.3	252351	5.7908		0.280343	0.0774536
95–96	0.0848225	40202.7	3410.09	38497.7	210461	5.235		0.307015	0.0848225
96–97	0.0925062	36792.6	3403.54	35090.8	171963	4.67386		0.334826	0.0925062
97–98	0.10045	33389.1	3353.95	31712.1	136872	4.09932		0.36358	0.10045
98–99	0.108592	30035.1	3261.58	28404.3	105160	3.50125		0.393049	0.108592
99–100	0.116862	26773.5	3128.8	25209.1	76756.1	2.86686		0.422981	0.116862
100 and over	1	23644.7	23644.7	51547	51547	2.18006
				The sum of person-years lived among ages 100–120 (L100-120)	51547
Age (years)	Mortality between ages x and x + 1	Probability of dying between ages x and x + 1	Number surviving to age x	Number dying between ages x and x + 1	Person-years lived between ages x and x + 1	Total number of person-years lived above age x	Expectation of life at age x
	Mx	qx	lx	dx	Lx	Tx	ex
99	0.37744	0.317518	26773.5	3128.8	25209.1	76756.1	2.86686
100	0.40983	0.340132	23644.7	8042.32	19623.6	51547	2.18006
101	0.443021	0.362683	15602.4	5658.73	12773	31923.4	2.04605
102	0.476729	0.384967	9943.68	3827.98	8029.69	19150.3	1.92588
103	0.51065	0.406787	6115.7	2487.79	4871.8	11120.6	1.81838
104	0.544474	0.427966	3627.91	1552.62	2851.6	6248.84	1.72244
105	0.577892	0.448344	2075.29	930.445	1610.07	3397.24	1.637
106	0.610612	0.467792	1144.84	535.549	877.07	1787.18	1.56106
107	0.642365	0.486204	609.296	296.242	461.174	910.107	1.4937
108	0.672916	0.503507	313.053	157.624	234.241	448.933	1.43404
109	0.702067	0.519652	155.429	80.7689	115.044	214.691	1.38128
110	0.729664	0.534618	74.6599	39.9146	54.7027	99.6471	1.33468
111	0.755595	0.548408	34.7454	19.0546	25.2181	44.9444	1.29354
112	0.779789	0.561042	15.6907	8.80316	11.2892	19.7264	1.2572
113	0.802215	0.572558	6.88757	3.94353	4.91581	8.4372	1.22499
114	0.822876	0.583005	2.94404	1.71639	2.08584	3.52139	1.19611
115	0.841804	0.592444	1.22765	0.727312	0.863992	1.43555	1.16935
116	0.859056	0.600937	0.500336	0.30067	0.350001	0.571559	1.14235
117	0.874707	0.608554	0.199666	0.121507	0.138912	0.221558	1.10964
118	0.888844	0.615363	0.0781583	0.0480958	0.0541105	0.0826458	1.05742
119	0.901566	0.621434	0.0300626	0.0186819	0.0207216	0.0285354	0.9492
120	0.912975	0.626833	0.0113807	0.00713378	0.00781377	0.00781377	0.686583
